1  
2  
3  
4  
5  
6  
7  
8  
9  
10  
11  
12  
13  
14  
15  
16  
17  
18  
19  
20  
21  
22

Protein polyglutamylation catalyzed by the bacterial Calmodulin-dependent  
pseudokinase SidJ

Alan Sulpizio<sup>a,b,1</sup>, Marena E. Minelli<sup>a,b,1</sup>, Min Wan<sup>a,b,1</sup>, Paul D. Burrowes<sup>a,b</sup>, Xiaochun Wu<sup>a,b</sup>,  
Ethan Sanford<sup>a,b</sup>, Jung-Ho Shin<sup>a,c</sup>, Byron Williams<sup>b</sup>, Michael Goldberg<sup>b</sup>, Marcus B. Smolka<sup>a,b</sup>,  
and Yuxin Mao<sup>a,b,\*</sup>

<sup>a</sup>Weill Institute for Cell and Molecular Biology, Cornell University, Ithaca, NY 14853, USA.

<sup>b</sup>Department of Molecular Biology and Genetics, Cornell University, Ithaca, NY 14853, USA.

<sup>c</sup>Department of Microbiology, Cornell University, Ithaca, NY 14853, USA.

<sup>1</sup>These authors contributed equally

Atomic coordinates and structure factors for the reported structures have been deposited into the  
Protein Data Bank under the accession codes: 6PLM

\*Correspondence:

E-mail: [ym253@cornell.edu](mailto:ym253@cornell.edu)

Telephone: 607-255-0783

23 **Abstract**

24 Pseudokinases are considered to be the inactive counterparts of conventional protein  
25 kinases and comprise approximately 10% of the human and mouse kinomes. Here we report the  
26 crystal structure of the *Legionella pneumophila* effector protein, SidJ, in complex with the  
27 eukaryotic Ca<sup>2+</sup>-binding regulator, Calmodulin (CaM). The structure reveals that SidJ contains a  
28 protein kinase-like fold domain, which retains a majority of the characteristic kinase catalytic  
29 motifs. However, SidJ fails to demonstrate kinase activity. Instead, mass spectrometry and in vitro  
30 biochemical analysis demonstrate that SidJ modifies another *Legionella* effector SdeA, an  
31 unconventional phosphoribosyl ubiquitin ligase, by adding glutamate molecules to a specific  
32 residue of SdeA in a CaM-dependent manner. Furthermore, we show that SidJ-mediated  
33 polyglutamylation suppresses the ADP-ribosylation activity. Our work further implies that some  
34 pseudokinases may possess ATP-dependent activities other than conventional phosphorylation.

35

36

37 **KEYWORDS**

38 SidJ; polyglutamylation; *Legionella pneumophila*; SdeA; phosphoribosyl ubiquitination;  
39 ubiquitin

40

## 41 **Introduction**

42           Phosphorylation mediated by protein kinases is a pivotal posttranslational modification  
43 (PTM) strategy affecting essentially every biological processes in eukaryotic cells (Brognard and  
44 Hunter, 2011; Cohen, 2002). The importance of protein phosphorylation is further endorsed by the  
45 fact that the mammalian genome contains more than 500 protein kinases, corresponding to ~2%  
46 of the total proteins encoded in the genome (Manning et al., 2002; Rubin et al., 2000). Despite the  
47 importance of phosphorylation, about 10% of kinases of the mammalian kinome lack key catalytic  
48 residues and are considered pseudokinases (Jacobsen and Murphy, 2017; Shaw et al., 2014).  
49 Accumulated evidence demonstrated that catalytically inactive pseudokinases have important  
50 noncatalytic functions, such as allosteric regulators (Scheeff et al., 2009; Zeqiraj et al., 2009) or  
51 nucleation hubs for signaling complexes (Brennan et al., 2011; Jagemann et al., 2008).  
52 Interestingly, a recent study uncovered AMPylation activity catalyzed by an evolutionary  
53 conserved pseudokinase selenoprotein (SelO) (Sreelatha et al., 2018). The SelO pseudokinases  
54 bind ATP with a flipped orientation relative to the ATP bound in the active site of canonical  
55 kinases and transfer the AMP moiety, instead of the  $\gamma$ -phosphate, from ATP to Ser, Thr, or Tyr  
56 residues on protein substrates. This finding suggests that pseudokinases should be reconsidered  
57 for alternative ATP-dependent PTM activities.

58           Protein glutamylation is another type of ATP-dependent PTM, in which the  $\gamma$ -carboxyl  
59 group of a glutamate residue in a targeted protein is activated by ATP and then forms a isopeptide  
60 bond with the amino group of a free glutamate. Alternatively, multiple glutamates can be  
61 sequentially added to the first to generate a polyglutamate chain (Janke et al., 2008). Protein  
62 glutamylation was first discovered on the proteins that build microtubules, the  $\alpha$ -tubulins and  $\beta$ -  
63 tubulins (Alexander et al., 1991; Edde et al., 1990; Redeker et al., 1992; Rudiger et al., 1992).

64 Further studies revealed that tubulin polyglutamylolation is mediated by a group of tubulin tyrosine  
65 ligase-like (TTL) family glutamylases (van Dijk et al., 2007). These glutamylases belong to ATP-  
66 grasp superfamily and have a characteristic fold of two  $\alpha/\beta$  domains with the ATP-binding active  
67 site situated between them (Garnham et al., 2015; Szyk et al., 2011). So far, the TTL  
68 polyglutamylases are the only family of enzymes catalyzing protein glutamylation although new  
69 polyglutamylated substrates have been identified besides tubulins (van Dijk et al., 2008).

70 The facultative intracellular pathogen *Legionella pneumophila* is the causative agent of  
71 Legionnaires' disease, a potentially fatal pneumonia (McDade et al., 1977; McKinney et al., 1981).  
72 *L. pneumophila* delivers a large number (>300) of effector proteins into the host cytoplasm through  
73 its Dot/Icm type IV secretion system (Segal et al., 1998; Vogel et al., 1998), leading to the creation  
74 of a specialized membrane-bound organelle, the *Legionella*-containing vacuole (LCV) (Hubber  
75 and Roy, 2010; Isberg et al., 2009; Lifshitz et al., 2013; Zhu et al., 2011). Among the large cohort  
76 of *Legionella* effectors, the SidE family of effectors have recently been identified as a group of  
77 novel Ub ligases that act independently of ATP,  $Mg^{2+}$  or E1 and E2 enzymes (Bhogaraju et al.,  
78 2016; Kotewicz et al., 2017; Qiu et al., 2016). This unusual SidE family ubiquitin ligases contain  
79 multiple domains including a mono-ADP-ribosyl transferase (mART) domain, which catalyzes  
80 ubiquitin ADP-ribosylation to generate mono-ADP-ribosyl ubiquitin (ADPR-Ub), and a  
81 phosphodiesterase (PDE) domain, which conjugates ADPR-Ub to serine residues on substrate  
82 proteins (phosphoribosyl-ubiquitination) (Akturk et al., 2018; Dong et al., 2018; Kalayil et al.,  
83 2018; Kim et al., 2018; Wang et al., 2018). Interestingly, the function of SidEs appears to be  
84 antagonized by SidJ (Lpg2155), an effector encoded by a gene resides at the same locus with genes  
85 encoding three members of the SidE family (Lpg2153, Lpg2156, and Lpg2157) (Liu and Luo,  
86 2007). It has been shown that SidJ suppresses the yeast toxicity conferred by the SidE family

87 effectors (Havey and Roy, 2015; Jeong et al., 2015; Urbanus et al., 2016). Furthermore, SidJ has  
88 been shown to act on SidE proteins and releases these effectors from the LCV (Jeong et al., 2015).  
89 A recent study reported that SidJ functions as a unique deubiquitinase that counteracts the SidE-  
90 mediated phosphoribosyl-ubiquitination by deconjugating phosphoribosyl-ubiquitin from  
91 modified proteins (Qiu et al., 2017). However, our recent results do not support this SidJ-mediated  
92 deubiquitinase activity (Wan et al., 2019) and the exact function of SidJ remains elusive.

93         The goal of the present study is to elucidate the molecular function of SidJ and to  
94 investigate the mechanism that underlies how SidJ antagonizes the PR-ubiquitination activity of  
95 SidEs. Here we report the crystal structure of SidJ in complex with human Calmodulin 2 (CaM)  
96 and reveal that SidJ adopts a protein kinase-like fold. A structural comparison allowed us to  
97 identify all the catalytic motifs conserved in protein kinases. However, SidJ failed to demonstrate  
98 protein kinase activity. Using SILAC (Stable Isotope Labeling by Amino acids in Cell culture)  
99 based mass spectrometry approach, we discovered that SidJ modifies SdeA by attaching the amino  
100 acid glutamate to a key catalytic residue on SdeA. Moreover, we found that this glutamylation  
101 activity by SidJ is CaM dependent and the glutamylation of SdeA suppresses its PR-ubiquitination  
102 activity. Thus our work provides molecular insights of a key PR-ubiquitination regulator in  
103 *Legionella* infection. We anticipate that our work will also have impact on the studies of  
104 pseudokinases and CaM-regulated cellular processes.

## 105 **Results**

### 106 **SidJ Binds CaM through its C-terminal IQ Motif**

107 To elucidate the biological function of SidJ, we performed sequence analyses and found  
108 that the C-terminus of SidJ contains the sequence “IQxxxRxxRK”, which resembles the IQ motif  
109 found in a number proteins, mediating the binding with Calmodulin (CaM) in the absence of Ca<sup>2+</sup>  
110 (Figure 1A) (Rhoads and Friedberg, 1997). To test whether this predicted IQ motif in SidJ can  
111 mediate an interaction with CaM, we prepared recombinant proteins of SidJ and CaM and  
112 incubated these proteins in the presence or absence of Ca<sup>2+</sup>. We then analyzed the samples with  
113 native PAGE and observed that a new band corresponding to the SidJ-CaM complex appeared in  
114 a Ca<sup>2+</sup> independent manner (Figure 1B). The formation of the complex was dependent on the intact  
115 IQ motif as the SidJ IQ mutant (I841D/Q842A) did not form a stable complex with CaM. The  
116 interaction between SidJ and CaM was further quantified by isothermal calorimetry (ITC) analysis,  
117 which showed a dissociation constant (K<sub>d</sub>) of about 89.6 nM between CaM and wild type SidJ  
118 with a 1:1 stoichiometry, while no binding was detected between CaM and SidJ IQ mutant (Figure  
119 1C). The association between SidJ and CaM was also demonstrated by size exclusion  
120 chromatography as the wild type SidJ and CaM co-fractionated while the SidJ IQ mutant migrated  
121 separately from CaM (Figure 1—figure supplement 1). Collectively, SidJ interacts with CaM  
122 through its C-terminal IQ motif in a Ca<sup>2+</sup> independent manner.

123

### 124 **Overall Structure of the SidJ and CaM Complex**

125 Despite extensive trials, we were unable to obtain protein crystals for SidJ alone. However,  
126 the stable interaction between SidJ and CaM allowed us to crystallize SidJ in complex with CaM.

127 The structure was determined by selenomethionine single wavelength anomalous dispersion (SAD)  
128 method and was refined to a resolution of 2.6 Å with good crystallographic R-factors and  
129 stereochemistry (Table 1). Based on the SidJ-CaM structure, the SidJ protein is comprised of four  
130 functional units: a N-terminal regulatory domain (NRD), a base domain (BD), a kinase-like  
131 catalytic domain, and a C-terminal domain (CTD) containing the CaM-binding IQ motif (Figure  
132 2). The N-terminal portion of the NRD (residues 1-88) is predicted to be intrinsically disordered  
133 and thus was not included in the SidJ construct for crystallization trials. The rest of the NRD  
134 (residues 89-133) adopts an extended structure with three  $\beta$ -strands and flexible connecting loops  
135 and meanders on the surface across the entire length of the kinase-like domain (Figure 2B and 2C).  
136 The BD is mainly comprised of  $\alpha$ -helices. It interacts with both the kinase-like domain and CTD  
137 and provides a support for these two domains to maintain their relative orientation. The CTD  
138 contains four  $\alpha$ -helices with the first three  $\alpha$ -helices forming a tri-helix bundle and the fourth IQ  
139 motif-containing  $\alpha$ -helix (IQ-helix) extending away from the bundle to engage in interactions with  
140 CaM. In the SidJ-CaM complex, CaM “grips” the IQ-helix with its C-lobe (Figure 2B and 2C, left  
141 panels) while its N-lobe interacts with the NRD, CTD, and the kinase-like domains. In agreement  
142 with our biochemical results that CaM binds SidJ in a  $\text{Ca}^{2+}$  independent manner (Figure 1). Only  
143 the first EF-hand of CaM is observed to coordinate with a  $\text{Ca}^{2+}$  ion based on the difference Fourier  
144 electron density map even though the crystal is formed in a crystallization buffer containing 1 mM  
145  $\text{CaCl}_2$  (Figure 2—figure supplement 1).

146

### 147 **The Core of SidJ Adopts a Protein Kinase Fold**

148 Although there is no detectable primary sequence homology to any known protein kinase,  
149 a structure homology search with the Dali server (Holm and Laakso, 2016) showed that the core

150 of SidJ most closely resembles the Haspin kinase (Villa et al., 2009) with a Z-score of 10.1. The  
151 SidJ core, thus named kinase-like domain, assumes a classical bilobed protein kinase fold (Figure  
152 3A-B). A detailed structural analysis revealed that the N-lobe of the SidJ kinase-like domain  
153 contains all the structural scaffolding elements conserved in protein kinases, including a 5-stranded  
154 antiparallel  $\beta$ -sheet and the  $\alpha$ C helix (the secondary structural elements are named according to  
155 PKA nomenclature) (Figure 3C). Furthermore, one of the key catalytic residues, K367 in the  $\beta$ 3  
156 strand, is conserved among all SidJ homologs (Figure 3—figure supplement 1 and 2). This residue  
157 is positioned towards the catalytic cleft to interact with the phosphate groups of ATP for catalysis.  
158 Similar to protein kinases, this invariable Lys is coupled by a conserved Glu (E381) in the  $\alpha$ C helix  
159 (Figure 3C). However, the “glycine-rich loop” connecting the  $\beta$ 1 and the  $\beta$ 2 strands forms a type I  
160  $\beta$ -turn structure whereas in canonical protein kinases, the corresponding loop is much longer and  
161 packs on top of the ATP to position the phosphate groups for phosphoryl transfer (Figure 3C and  
162 Figure 3—figure supplement 1 and 2). Surprisingly, a pyrophosphate ( $PP_i$ ) molecule and two  $Ca^{2+}$   
163 ions are bound within the kinase catalytic cleft (Figure 3D and E).  $PP_i$  is likely generated from  
164 ATP that was added to the crystallization condition. The presence of a  $PP_i$  molecule in the catalytic  
165 cleft indicates that SidJ may have an ATP-dependent catalytic function but not traditional  
166 phosphoryl transfer catalyzed by protein kinases.

167 In contrast to the N-lobe, the C-lobe of the kinase-like domain is mainly helical. Three  
168 recognizable helices equivalent to the  $\alpha$ E,  $\alpha$ F, and  $\alpha$ H helices in protein kinases set a foundation  
169 for three catalytic signature motifs on the C-lobe, including the HRD motif-containing catalytic  
170 loop, the DFG motif-containing  $Mg^{2+}$ -binding loop, and the activation loop. These motifs are  
171 distributed within a long peptide connecting the  $\alpha$ E and  $\alpha$ F helices and are positioned at a similar  
172 location as in protein kinases (Figure 3C). Despite many conserved features between SidJ and



173 canonical protein kinases, there are two unique features in the catalytic loop of SidJ. First, the  
174 aspartic acid in the HRD motif conserved in canonical kinases is notably different in SidJ, in which  
175 Q486 takes the position of D166 in PKA for the activation of substrates. Second, the catalytic loop  
176 of SidJ contains a 48-residue insertion between Q486 and the downstream conserved N534, albeit  
177 there are only four residues between D166 and N171 in PKA (Figure 3C and Figure 3—figure  
178 supplement 1 and 2). Interestingly, this large insertion creates a pocket that accommodates an AMP  
179 molecule (likely the breakdown product from ATP) (Figure 3D and F). The AMP molecule was  
180 also observed in this so-called migrated nucleotide-binding pocket in a recent reported SidJ-CaM  
181 structure (Black et al., 2019). The presence of this unique migrated nucleotide-binding pocket in  
182 SidJ further indicates that SidJ may have a distinct catalytic function other than a canonical protein  
183 kinase. Indeed, we were unable to detect any kinase activity for SidJ by in vitro kinase assays using  
184 [ $\gamma$ - $^{32}$ P]ATP (Figure 3—figure supplement 3A and 3B), even though most of the catalytic and  
185 scaffolding motifs essential for protein kinases are conserved in the SidJ kinase-like domain. In  
186 light of a recent discovery that the SelO pseudokinase has AMPylation activity (Sreelatha et al.,  
187 2018), we then tested whether SidJ is an AMPylase. A similar assay was performed with the  
188 substitution of ATP by [ $\alpha$ - $^{32}$ P]ATP. Surprisingly,  $^{32}$ P incorporation was observed for SidJ itself  
189 but not for SdeA (Figure 3—figure supplement 3C and 3D). Interestingly, similar auto-  
190 AMPylation activity of SidJ was also observed in a recent publication (Gan et al., 2019). It is likely  
191 that auto-AMPylation of SidJ may be either a side reaction or an intermediate step for SidJ-  
192 mediated modification on SdeA.

193

194 **SidJ Catalyzes Polyglutamylation of SdeA**

195 To determine the exact catalytic function of SidJ, we used a SILAC (Stable Isotope  
196 Labeling by Amino acids in Cell culture) mass spectrometry. HEK293T cells grown in complete  
197 medium containing heavy [<sup>13</sup>C6]lysine [<sup>13</sup>C6]arginine were co-transfected with GFP-SdeA and  
198 mCherry-SidJ while cells grown in regular medium were transfected with GFP-SdeA and a  
199 mCherry plasmid control. GFP-SdeA proteins were enriched by immunoprecipitation. MS analysis  
200 of immunoprecipitated SdeA revealed that one trypsinized peptide corresponding to the SdeA  
201 mono-ADP ribosylation catalytic site (residues 855-877) was dramatically reduced in the heavy  
202 sample prepared from cells transfected with both SidJ and SdeA compared to its light counterpart  
203 prepared from cells transfected with SdeA and a control plasmid (Figure 4A and B). This peptide  
204 generates two signature ions upon MS2 fragmentation due to the presence of two labile proline  
205 residues in the sequence. We then used this feature to search for any peptide from the heavy sample  
206 that produced these two signature ions. Multiple MS2 spectrum contained these two signature ions  
207 (Figure 4—figure supplement 1A-D). Strikingly, all these peptides had a mass increase of  $n \times 129$   
208 Da, which matches the mass change corresponding to posttranslational modification by  
209 polyglutamylation. The MS data were then re-analyzed for polyglutamylation. The modification  
210 of the SdeA peptide was revealed as either mono-, di-, or tri-glutamylation with the predominant  
211 species being di-glutamylation (Figure 4—figure supplement 1E). Furthermore, the  
212 polyglutamylation site was identified at SdeA residue E860 by MS/MS analysis (Figure 4C). The  
213 activity of SidJ was then reconstituted in vitro using [U-<sup>14</sup>C]Glu. Consistent with the mass  
214 spectrometry results, wild type SdeA core (residues 211-1152) but not its E860A mutant, was  
215 modified with glutamate. In addition, polyglutamylation of SdeA by SidJ was dependent on both  
216 CaM and ATP/Mg<sup>2+</sup> (Figure 4D). Since E860 is one of the key catalytic residues in the mART

217 domain of SdeA (Figure 4—figure supplement 2), it is likely that polyglutamylolation of E860 may  
218 inhibit SdeA-mediated ADP-ribosylation of ubiquitin.

219

## 220 **SidJ Suppresses the PR-ubiquitination Activity of SdeA**

221 To test whether SidJ directly inhibits SdeA activity, we performed in vitro ubiquitin  
222 modification and PR-ubiquitination assays with either untreated or SidJ-pretreated SdeA.  
223 Ubiquitin was modified in the presence of NAD<sup>+</sup> by purified SdeA to generate ADPR-Ub as  
224 indicated by a band-shift of ubiquitin on a Native PAGE gel. However, when SdeA was pre-  
225 incubated with SidJ, CaM, ATP/Mg<sup>2+</sup>, and glutamate, ubiquitin modification by SdeA was  
226 substantially reduced (Figure 5A) but was not affected if the pretreatment lacked either glutamate,  
227 ATP or CaM (Figure 5A). In agreement with impaired ADPR-Ub generation, SdeA-mediated PR-  
228 ubiquitination of a substrate, Rab33b was also inhibited in a reaction with SidJ-treated SdeA  
229 (Figure 5B). We further investigated whether SidJ can also regulate the PR-ubiquitination process  
230 during *Legionella* infection. HEK293T cells were first transfected with 4xFlag-tagged Rab33b and  
231 FCγRII then infected with the indicated opsonized *Legionella* strains for 2 hours. Rab33b was then  
232 immunoprecipitated and analyzed with anti-Flag Western blot (Figure 5C). The total amount of  
233 PR-ubiquitinated Rab33b was more than doubled in cells infected with *ΔsidJ* strain. However,  
234 complementation with a plasmid expressing wild type, but not the D542A SidJ mutant, reduced  
235 Rab33b PR-ubiquitination to a level comparable to infection with the wild type *Legionella* strain  
236 (Figure 5C and D). Taken together, these data suggest that SidJ suppresses the PR-ubiquitination  
237 via SidJ-mediated polyglutamylolation of SdeA.

238

## 239 **Molecular Determinants of Protein Glutamylation Catalyzed by SidJ**

240           The identification of SidJ as a polyglutamylase raised an intriguing question, how can a  
241 kinase-like enzyme attach glutamates to its targets. To address this question, selected residues in  
242 the canonical kinase catalytic cleft and in the migrated nucleotide binding pocket were  
243 mutagenized and the functions of these mutants were interrogated for their polyglutamylation  
244 activities and their ability to inhibit SdeA in vitro. In the SidJ kinase catalytic cleft, two Ca<sup>2+</sup> ions  
245 are coordinated by residues N534, D542, and D545, while the PP<sub>i</sub> molecule is stabilized by R352  
246 from the Gly-rich loop and the conserved K367, which in turn is stabilized by E381 from the  $\alpha$ C  
247 helix (Figure 6A and B). On the other hand, in the migrated nucleotide binding pocket, the aromatic  
248 adenine base of AMP is stacked with the imidazole ring of H492, while Y506 forms the interior  
249 wall of the pocket (Figure 6C). These residues were mutated to Alanine and the polyglutamylation  
250 activity of these SidJ mutants were examined. The polyglutamylation activity of SidJ was  
251 completely abolished in the K367A, D542A, and H492 mutants and was severely impaired in the  
252 N534A mutant. The polyglutamylation activity was slightly reduced in the R352A and Y506A  
253 mutants while the E381A, D489A, and D545A mutations had little or no impact on the activity of  
254 SidJ (Figure 6D-F). In addition, the polyglutamylation activity of SidJ mutants correlated well  
255 with their inhibition on SdeA-mediated modification of Ub (Figure 6—figure supplement 1).

256           It is intriguing that the polyglutamylation activity of SidJ was abolished by mutations at  
257 either the canonical kinase-like active site (K367A or D542A) or at the migrated nucleotide  
258 binding site (H492). It has been proposed that the kinase-like active site catalyzes the transfer of  
259 AMP from ATP to E860 on SdeA while the migrated nucleotide binding site catalyzes the  
260 replacement of AMP with a glutamate molecule to complete glutamylation of SdeA at E860 (Black  
261 et al., 2019). However, it may also be possible that the glutamylation reaction takes place at the

262 kinase-like active site whereas the migrated nucleotide binding site serves as an allosteric site, in  
263 which binding of an AMP molecule at the migrated nucleotide binding site is a prerequisite for  
264 SidJ activation. To test these two hypothesis, we took advantage of the auto-AMPylation activity  
265 of SidJ. If the first hypothesis is true, one would expect that the SidJ H492A mutant would be  
266 competent for auto-AMPylation since it has an intact kinase active site. Strikingly however, SidJ  
267 auto-AMPylation was completely abolished in both the D542A and H492A mutants. These data  
268 suggest that the migrated nucleotide binding site is likely an allosteric site (created entirely by a  
269 large insertion within the catalytic loop). The binding of a nucleotide to this site is likely to stabilize  
270 the catalytic loop of the kinase-like domain in a catalytically competent conformation.

271

## 272 **Activation of SidJ by CaM**

273 Our in vitro assays demonstrated that the polyglutamylation activity of SidJ requires  
274 binding with CaM. We next asked how CaM activates SidJ. A close examination of the SidJ-CaM  
275 complex structure revealed that the highly acidic CaM binds with the basic IQ-helix of SidJ mainly  
276 through its C-lobe (Figure 7A and C and Figure 7—figure supplement 1). The C-lobe of CaM  
277 assumes a semi-open conformation, which creates a groove between CaM helices F and G and  
278 helices E and H to grip the amphipathic IQ-helix of SidJ (Figure 7—figure supplement 2).  
279 Conserved hydrophobic residues aligned inside the groove make numerous van der Waals  
280 interactions with the hydrophobic side of the IQ-helix centered at I841, whereas acidic residues  
281 located at the edge of the groove form hydrogen bonds and salt bridges with polar residues on the  
282 hydrophilic side of the IQ-helix (Figure 7C). In contrast, the N-lobe of CaM maintains a closed  
283 conformation similar to that observed in free apo-CaM (Kuboniwa et al., 1995) or in the myosin  
284 V IQ1-CaM complex (Houdusse et al., 2006) even though one  $\text{Ca}^{2+}$  ion is chelated by the first EF-

285 hand of CaM (Figure 7—figure supplement 3A). Interestingly, the binding of this calcium ion does  
286 not cause a conformational change observed in CaM fully chelated with  $\text{Ca}^{2+}$  (Meador et al., 1992)  
287 since the conserved E31 of CaM is not positioned for chelation at the -Z coordination position  
288 (Figure 7—figure supplement 3B-D).

289 A structural comparison of SidJ-CaM with myosin V IQ1-CaM complex revealed that  
290 although both of the N- and C-lobes of CaM have a similar conformation with their corresponding  
291 lobes, the relative orientation between two lobes assumes a remarkably different conformation in  
292 the two complexes (Figure 7—figure supplement 4). Unlike the CaM in the myosin V IQ1-CaM  
293 complex, in which the N-lobe packs close to and makes a large number of contacts with the IQ-  
294 helix, the CaM N-lobe in the SidJ-CaM complex is shifted away from the IQ-helix and engages  
295 extensive interactions with other basic areas of SidJ, including the first  $\beta$ -strand ( $\beta_{\text{N1}}$ ) of the NRD  
296 domain (Figure 7B and D). Besides electrostatic interactions between the CaM N-lobe and SidJ,  
297 two carbonyl groups within the first  $\text{Ca}^{2+}$ -binding loop of the CaM N-lobe form hydrogen bonds  
298 with two backbone amide groups of the  $\beta_{\text{N1}}$  strand (Figure 7D). These interactions between the  
299 CaM N-lobe and the  $\beta_{\text{N1}}$  strand may stabilize a two-stranded antiparallel  $\beta$  sheet composed of  $\beta_{\text{N1}}$   
300 of the NRD domain and  $\beta_0$  of the kinase-like domain, which may further stabilize the activation  
301 loop in a presumably active conformation (Figure 7D). The stabilization of the activation loop is  
302 reminiscent of the activation process in canonic kinases, in which phosphorylation of specific  
303 residues in the activation loop provides an anchor to maintain the activation loop in the correct  
304 conformation for catalysis (Adams, 2003). Based on these structural observations, we  
305 hypothesized that CaM-binding stabilizes a two-stranded  $\beta$  sheet on the surface of SidJ, which in  
306 turn interacts with the activation loop of the kinase-like domain to maintain the activation loop in  
307 an active conformation. Indeed, although the SidJ IQ mutant demonstrated a modest reduction in

308 activity, the  $\beta_{N1}$  deleted SidJ truncation (residue 110-853) showed a severe impairment in  
309 polyglutamylation of SdeA (Figure 7E and F). Together, our data suggest that CaM-binding may  
310 activate SidJ through a network of interactions involving the CaM N-lobe, the  $\beta_{N1}$  strand of the  
311 NRD, and the  $\beta_0$  strand and the activation loop of the kinase-like domain.

312

## 313 Discussion

314 In this study, we reported the crystal structure of a *Legionella* effector SidJ in complex  
315 with human CaM. Through structural, biochemical, and mass spectrometric studies, we identified  
316 the biochemical function of SidJ as a protein polyglutamylase that specifically adds glutamates to  
317 a catalytic glutamate residue E860 of another *Legionella* effector SdeA and thus inhibits the PR-  
318 ubiquitination process mediated by SdeA. To date, the only enzymes that have been identified to  
319 catalyze protein glutamylation belong to the tubulin tyrosine ligase-like (TTLL) protein family  
320 (Janke et al., 2008). The TTLL enzymes have an active site that lies between two characteristic  
321  $\alpha/\beta$  domains. An elegant crystal structure of TTLL7 in combination with a cryo-electron  
322 microscopy structure of TTLL7 bound to the microtubule revealed that the anionic N-terminal tail  
323 of  $\beta$ -tubulin extends through a groove towards the ATP-binding active site for the modification.  
324 By contrast, the catalytic core of SidJ adopts a protein kinase-like fold. Surprisingly, besides the  
325 canonical kinase-like active site, SidJ also has a second “migrated” nucleotide-binding site created  
326 by a large insertion in the kinase catalytic loop. The two sites are both required to complete the  
327 polyglutamylation reaction as single amino acid point mutations of key residues at either site  
328 inactivate SidJ (Figure 6). We further showed that the auto-AMPylation activity of SidJ was also  
329 impaired by mutations at either the kinase-like active site or the migrated nucleotide-binding site.  
330 These observations led us to propose a reaction model for SidJ-mediated polyglutamylation  
331 (Figure 8). In this model, SidJ is activated by CaM binding at its C-terminal IQ helix and a  
332 nucleotide binding at its migrated nucleotide-binding pocket. Activated SidJ first attaches the AMP  
333 moiety from ATP to the  $\gamma$ -carbonyl group of residue E860 of SdeA. In the second step, the  
334 adenylated E860 is attacked by the amino group of a free glutamate to form an isopeptide linkage  
335 by releasing AMP. However, several prominent questions remain to be addressed, such as how



336 SidJ recognizes SdeA and specifically attaches glutamates to residue E860 of SdeA. Furthermore,  
337 how the specificity is achieved to modify SdeA with glutamate residues but not other amino acids.  
338 To answer these questions, more biochemical assays, as well as structural studies of SidJ in  
339 complex with substrates or intermediates are warranted.

340         Interestingly, SidJ contains a C-terminal consensus IQ motif that mediates CaM-binding  
341 independent of calcium. The binding of the IQ helix is mainly through the CaM C-lobe, which  
342 adopts a semi-open conformation similar to that observed in apo-CaM-IQ helix complex. However,  
343 unlike other apo-CaM complexes, where the CaM N-lobe wraps around the IQ-helix, the N-lobe  
344 in the SidJ-CaM complex rotates along the inter-lobe linker about 120 degree and swings away  
345 from the IQ-helix to engage in extensive interactions with other parts of SidJ, particularly the  $\beta_{N1}$   
346 strand of the NRD domain. These interactions may allosterically stabilize a hydrophobic core,  
347 which may serve as an anchor point for the kinase activation loop to active the enzyme. SidJ-CaM  
348 seems to apply a unique CaM-dependent regulatory mechanism to maintain an active conformation.  
349 Thus, the binding mode of CaM with SidJ presents an exemplary mechanism to the repertoire of  
350 CaM-effector interactions. The activation of SidJ by CaM is also of particular interest from an  
351 evolutionary point of view. Both SidJ and SdeA are expressed in *Legionella* cells, while the  
352 polyglutamylation, hence the inhibition of SdeA can only occur after they have been delivered into  
353 eukaryotic host cells. A similar example has been reported for the CaM-mediated activation of  
354 anthrax adenyl cyclase exotoxin (Drum et al., 2002). This type of cross-species regulation may  
355 represent a common theme in bacterial pathogen-eukaryotic host interactions.

356         SidJ was first identified as a metaeffector that neutralizes the toxicity of the SidE family  
357 phosphoribosyl ubiquitin ligases in yeast (Havey and Roy, 2015; Jeong et al., 2015). A previous  
358 publication assigned SidJ as a deubiquitinase that deconjugates phosphoribosyl-linked protein

359 ubiquitination (Qiu et al., 2017). However, this unusual deubiquitination activity was not  
360 repeatable in another study (Black et al., 2019), as well as in our unpublished studies. The  
361 definitive biochemical function of SidJ is now revealed in this study, as well as by recent reports  
362 (Bhogaraju et al., 2019; Black et al., 2019; Gan et al., 2019), as a polyglutamylase that adds  
363 glutamates to a specific catalytic residue E860 of SdeA and subsequently inhibits the PR-  
364 ubiquitination activity of SdeA. An interesting question arises at this point as whether there are  
365 other glutamylation substrates, especially from the host, besides the SidE family PR-ubiquitination  
366 ligases. Given that SidJ is one of the few effectors that exhibits growth defects when deleted from  
367 *L. pneumophila* and plays a role in membrane remodeling during *Legionella* infection (Liu and  
368 Luo, 2007), it is possible that SidJ modifies host targets to control certain host cellular processes.  
369 On the other hand, it seems to be a common scheme in *Legionella* species to encode effectors  
370 catalyze counteractive reactions. For example, the *Legionella* effector SidM/DrrA AMPylates  
371 Rab1 and locks it in an active GTP state (Muller et al., 2010) while SidD is a deAMPylase that  
372 antagonizes SidM (Neunuebel et al., 2011; Tan and Luo, 2011). Another example is the pair of  
373 effectors AnkX and Lem3, of which AnkX transfers a phosphocholine moiety to Rab1 family  
374 members (Mukherjee et al., 2011) while Lem3 removes the phosphocholine moiety added by  
375 AnkX from Rab1 (Tan et al., 2011). In respect of this scheme, it is possible that *L. pneumophila*  
376 may also encode an effector that counteracts SidJ by removing glutamate residues from targets.  
377 Future investigation of effectors harboring such a de-glutamylation activity would provide a  
378 comprehensive understanding of the regulation cycle of protein glutamylation taken place during  
379 *Legionella* infection.

380 It is also noteworthy that homologs of SidJ can be detected in a variety of microorganisms,  
381 including *Elusimicrobia bacterium*, *Desulfovibrio hydrothermalis*, and *Waddlia chondrophila*.

382 Furthermore, the key catalytic motifs found in SidJ are also readily detectable in these homologs  
383 (Figure 3—figure supplement 1). It would be interesting to elucidate whether these SidJ homologs  
384 have a comparable activity to SidJ. In summary, our results have identified SidJ contains kinase-  
385 like fold and functions as a protein polyglutamylase. Our results may contribute inspiring hints to  
386 the search for other potential protein polyglutamylases and to the studies of pseudokinases for  
387 alternative ATP-dependent activities.

388 **Materials and Methods**

389

390 **Cloning and mutagenesis.** SidJ was PCR amplified from *Legionella* genomic DNA and digested  
391 with BamH1 and Sall and cloned into pmCherry-C1 and pZL507 (obtained from Dr. Zhao-Qing  
392 Luo, Purdue University) vectors for mammalian and *Legionella* expression respectively. For  
393 protein purification, the SidJ 89-853 truncation was amplified for pmCherry and cloned into the  
394 vector pET28a-6xHisSumo using vector BamH1 and the reverse isoschizomer Xho1 site. Human  
395 CaM2, SdeA 211-1152 truncation was cloned into pET28a 6xHisSumo using BamH1 and Xho1  
396 sites on both vector and insert. For *Legionella* genomic deletions, 1.2 Kb regions upstream and  
397 downstream of SidJ were cloned into the pRS47s suicide plasmid (obtained from Dr. Zhao-Qing  
398 Luo). Site directed mutagenesis was then performed with overlapping primers on each vector. All  
399 constructs were transformed into chemically competent Top10 cells, with the exception of pRS47s  
400 vector which was transformed into DH5 $\alpha$   $\lambda$ pir.

401

402

403 **Protein Purification.** All pET28a 6x-HisSumo constructs including SidJ 89-853, CaM, SdeA  
404 211-1152, and point mutants were transformed into E. coli Rosetta (DE3) cells. Single colonies  
405 were then cultured in Luria-Bertani (LB) medium containing 50  $\mu$ g/ml kanamycin to a density  
406 between 0.6 and 0.8 OD<sub>600</sub>. Cultures were induced with 0.1 mM isopropyl-B-D-  
407 thiogalactopyranoside (IPTG) at 18°C for 12 hours. Cells were collected by centrifugation at 3,500  
408 rpm for 15 minutes at 4°C and sonicated to lyse bacteria. To separate insoluble cellular debris,  
409 lysates were then centrifuged at 16,000 rpm for 45 minutes at 4°C. The supernatant was incubated  
410 with cobalt resin (Gold Biotechnology) for 2 hours at 4°C to bind proteins and washed extensively

411 with purification buffer (20 mM Tris pH 7.5, 150 mM NaCl). Proteins of interest were then  
412 digested on the resin with SUMO-specific protease Ulp1 to release the protein from the His-SUMO  
413 tag and resin. The digested protein was concentrated and purified further by FPLC size exclusion  
414 chromatography using a Superdex S200 column (GE life science) in purification buffer. Pure  
415 fractions were collected and concentrated in Amicon Pro Purification system concentrators.

416

417 **Native PAGE analysis of SidJ-CaM complex.** SidJ 89-853 WT and SidJ IQ mutant were  
418 incubated at a concentration of 5  $\mu$ M with 10  $\mu$ M of CaM in the presence of 1 mM CaCl<sub>2</sub> or 1 mM  
419 EGTA in 50 mM Tris pH 7.5 and 150 mM NaCl. Samples were then analyzed by Native PAGE  
420 and gels were stained with Coomassie Brilliant Blue.

421

422 **Isothermal titration calorimetry (ITC).** SidJ 89-853 WT, IQ mutant and CaM were used for ITC  
423 experiments. CaM at 88.6  $\mu$ M concentration was titrated into SidJ 89-853 WT and IQ mutant at  
424 20  $\mu$ M concentration. CaM was titrated in 15 injections at 5  $\mu$ L with spacing between injections  
425 ranging from 150 s to 400 s, until the baseline equilibrated. These experiments used the Affinity  
426 ITC from TA instruments at 25°C. Data analysis was performed on NanoAnalyze v3.10.0.

427

428 **Analytical size exclusion.** SidJ and IQ mutant were incubated at a concentration of 35  $\mu$ M in the  
429 presence or absence of 1.2 molar ratio of CaM. 125  $\mu$ L of solution were injected onto a Superdex  
430 200 Increase 100/300 GL column (GE) and separated at 0.7 mL/min on an AKTA Pure 25L System  
431 (GE). UV traces were generated using R-Studio Software and 0.5 mL fractions were collected and  
432 analyzed by SDS-PAGE. Gels were stained with Coomassie brilliant blue.

433

434 **Protein crystallization.** Protein crystallization screens were performed on the Crystal Phoenix  
435 liquid handling robot (Art Robbins Instruments) at room temperature using commercially available  
436 crystal screening kits. Prior to screening and hanging drop experiments, SidJ and CaM were  
437 incubated at a 1 to 2 molar ratio for 1 hour on ice. The conditions that yielded crystals from the  
438 screen were optimized by hanging-drop vapor diffusion by mixing 1  $\mu$ L of the protein complex  
439 with 1  $\mu$ L of reservoir solution. All optimization by hanging-drop vapor diffusion was performed  
440 at room temperature. Specifically, for SidJ-CaM crystallization, SidJ was concentrated to 9.4  
441 mg/mL and crystallized in 0.2 M sodium iodide, 15% PEG 3350, 0.1 M Tris pH 9.2, 1 mM  $\text{CaCl}_2$   
442 and 1 mM ATP. Rod shaped crystals formed within 4-5 days.

443

444 **X-Ray diffraction data collection and processing.** Diffraction datasets for SidJ-CaM were  
445 collected at National Synchrotron Light Source II (NSLSII) beamline AMX (17-ID-1) at  
446 Brookhaven National Laboratory. Before data collection, all crystals were soaked in cryoprotectant  
447 solutions that contained the crystallization reservoir condition, supplemented with 25% glycerol.  
448 All soaked crystals were flash frozen in liquid nitrogen prior to data collection. X-ray diffraction  
449 data were indexed, integrated, and scaled with HKL-2000 (Otwinowski and Minor, 1997).

450

451 **Structure determination and refinement.** The structure of SidJ was solved by using single  
452 wavelength anomalous dispersion (SAD) method with selenomethionine-incorporated crystals.  
453 Heavy atom sites were determined and phasing was calculated using HKL2MAP (Pape and  
454 Schneider, 2004). Iterative cycles of model building and refinement were performed using COOT  
455 (Emsley and Cowtan, 2004) and refmac5 (Murshudov et al., 1997) of the CCP4 suite  
456 (Collaborative Computational Project, 1994). Surface electrostatic potential was calculated with

457 the APBS (Baker et al., 2001) plugin in PyMOL. All structural figures were generated using  
458 PyMOL (The PyMOL Molecular Graphics System, Version 1.8.X, Schrödinger, LLC).

459

460 **Protein sequence analysis.** Sequences homologous to SidJ were selected from the NCBI BLAST  
461 server. All sequences were aligned using Clustal omega (Sievers et al., 2011) and colored using  
462 the Multiple Align Show server (<http://www.bioinformatics.org/sms/index.html>)

463

464 **SILAC and mass spectrometry sample preparation.** HEK293T cells were grown for 5 passages  
465 in media containing Light ( $^{12}\text{C}^{14}\text{N}$  Lys and Arg), or heavy ( $^{13}\text{C}^{15}\text{N}$  Lys and Arg) amino acids. Light  
466 HEK-293T cells transfected for 36 hours with pEGFP-SdeA and pmCherry and heavy HEK-293T  
467 cells transfected with pEGFP-SdeA and pmCherry-SidJ. Cells were then washed twice with cold  
468 PBS and resuspended using a cell scraper into lysis buffer (50 mM Tris pH 8.0, 150 mM NaCl, 1%  
469 Triton X-100, 0.1 % NaDOC, PMSF and Roche Protease Cocktail). Cells were sonicated and  
470 lysates were centrifuged at 16,000xg for 15 minutes at 4°C. Supernatants were incubated for 4  
471 hours with GFP nanobeads and washed with IP wash buffer (50 mM Tris-HCl pH 8.0, 150 mM  
472 NaCl, 1% Triton). Proteins were eluted by incubation of resin in 100 mM Tris HCl pH 8.0, 1%  
473 SDS at 65°C for 15 minutes. Eluates were reduced with 10 mM DTT and alkylated with 25 mM  
474 iodoacetamide. Heavy and light samples were mixed and precipitated on ice in PPT (49.9%  
475 ethanol, 0.1% glacial acetic acid, and 50% acetone). Proteins were pelleted by centrifugation at  
476 16,000xg, dried by evaporation and resolubilized in 8 M Urea in 50  $\mu\text{M}$  Tris pH 8.0. The sample  
477 was digested overnight with trypsin gold at 37°C. Trypsinized samples were acidified with formic  
478 acid and trifluoroacetic acid and bound to a C18 column (Waters) and washed with 0.1% acetic  
479 acid. Peptides were eluted with 80% acetonitrile and 0.1% acetic acid and dried. Samples were

480 resuspended in 0.1 picomol/uL of angiotensin in 0.1% TFA and frozen for mass spectrometry  
481 analysis.

482

483 **Mass spectrometry analysis.** Trypsinized SILAC-IP eluates from HEK-293T cells expressing  
484 either GFP-SdeA grown in  $^{12}\text{C}^{14}\text{N}$  Lys + Arg, or GFP-SdeA and mCherry-SidJ grown in  $^{13}\text{C}^{15}\text{N}$   
485 Lys + Arg were analyzed on a ThermoFisher Q-Exactive HF mass spectrometer using a homemade  
486  $\text{C}_{18}$  capillary column. Peptide spectral matches were identified using a SEQUEST search through  
487 Sorcerer2 from Sage-N, and subsequently quantified by Xpress to identify peptides that were  
488 highly enriched in the SdeA-light sample (indicating the absence of that peptide from the heavy  
489 condition because of a modification). Following identification of a single peptide,  
490 R.HGEGTESEFSVYLPEDVALVPVK.V, that was disproportionately enriched in the SdeA-only  
491 condition, the .raw file from the mass spectrometer was manually inspected to find MS2 spectra  
492 which had a similar retention time and contained peaks at  $m/z = 351$  and  $1074$ , as these masses  
493 were characteristic of the precursor peptide found in the SdeA-only condition due to the peptide  
494 containing two labile prolines. The monoisotopic precursor mass of the original, unmodified  
495 peptide from the SdeA-only condition was subtracted from the precursor mass of the most  
496 abundant peak fitting the above description. This difference corresponded to glutamylation. The  
497 original file was subsequently searched in Sorcerer2 using glutamylation (monoisotopic mass of  
498  $129.042587$  Da) as a differential modification, and glutamylation sites were identified in the  
499 original peptide with Xpress scores that corresponded to their presence exclusively in the heavy  
500 condition (SdeA + SidJ).

501



502 **In vitro glutamylation assays and SdeA inhibition.** In vitro glutamylation assays were  
503 conducted with 0.5  $\mu$ M SidJ 89-853, 5  $\mu$ M CaM, 5 mM  $MgCl_2$ , 5 mM Glutamic Acid, and 1  $\mu$ M  
504 SdeA 231-1152 in a buffer containing 50 mM Tris pH 7.5 and 50 mM NaCl. Reactions were then  
505 initiated by addition of 1 mM ATP for 30 minutes at 37°C. For SdeA inhibition assays, a second  
506 ubiquitination reaction was conducted containing 25  $\mu$ M ubiquitin and initiated with 1 mM  $NAD^+$ .  
507 When testing PR-Ub ligation 10 mM Rab33b 1-200 served as a substrate. Reactions were then  
508 fixed with 5X SDS loading buffer or 6X DNA loading buffer and electrophoresed with 12% SDS-  
509 PAGE gels to assay PR-Ubiquitination, or native gels to assay Ub modification. Gels were stained  
510 with Coomassie Brilliant Blue stain.

511

512 **Radioactive glutamylation assay.** Assays were conducted in a similar manner to non-radioactive  
513 glutamylation assays with the following exceptions, the concentration of SdeA was 2  $\mu$ M, and 50  
514  $\mu$ M (1.76 nCi) of U-C14 Glutamate (Perkin Elmer) was used as a reactant. For SidJ mutants,  
515 glutamylation reactions were terminated after a 15 min reaction at 37°C with 5X SDS loading  
516 buffer. Samples were then electrophoresed by SDS-PAGE and gels were dried. Protein labeling  
517 was then visualized by a 3-4 days exposure using an image screen (FUJI BOS-III) and a  
518 phosphorimager (Typhoon FLA 7000, GE). Quantifications were performed using the program FIJI  
519 where background signal was subtracted from band intensity and divided by wild type SidJ  
520 intensity. All reactions were performed in triplicate.

521

522 **In vitro radioactive kinase assays.** Assays were conducted by incubating 0.1 and 1  $\mu$ M SidJ in  
523 1X Protein Kinase buffer (NEB), with 10 mM  $CaCl_2$ , 3  $\mu$ M CaM, and 0.1  $\mu$ g/ $\mu$ L MBP, and 1  $\mu$ M  
524 SdeA 1-910. To initiate reactions an ATP mixture containing 100  $\mu$ M cold ATP with 2.5  $\mu$ Ci

525 ATP $\gamma$ P<sub>32</sub> (Perkin Elmer) for 30 min at 30°C. Samples were then boiled and electrophoresed with  
526 SDS-PAGE gels which were dried and exposed for 2 hours to multiple days to visualize radioactive  
527 signal.

528

529 **In vitro AMPylation assays:** SidJ and point mutants at a concentration of 0.5  $\mu$ M were incubated  
530 with 50 mM Tris pH 7.5, 50 mM NaCl, with 5  $\mu$ M CaM, 5 mM MgCl<sub>2</sub>, and in the presence or  
531 absence of 2  $\mu$ M SdeA 231-1152 or SdeA truncations. Reactions were initiated with 2.5  $\mu$ Ci  
532 ATP $\alpha$ P<sub>32</sub> for 30 minutes at 37°C. Samples were electrophoresed by SDS-PAGE, gels were dried  
533 and exposed between 1 hour and overnight to identify radioactive signals.

534

535 **Legionella strains and infections.** *Legionella* strains used in this study include the wild type LP02  
536 and the Dot/Icm deficient LP03 stains. The  $\Delta$ *sidJ* strain was generated with triparental mating of  
537 the recipient WT strain, the pHelper strain and the donor E. coli DH5 $\alpha$   $\lambda$ pir carrying the suicide  
538 plasmid pSR47s-*sidJ*. Integration of the plasmid was selected first with CYET plates containing  
539 20  $\mu$ g/mL of Kanamycin and then counterselected with CYET plates containing 5% sucrose.  
540 Colonies with genomic deletion were confirmed by PCR. Complementation strains were produced  
541 by electroporation of pZL507 plasmids containing SidJ wild type or D542A mutant into the  $\Delta$ *sidJ*  
542 strain.

543 HEK293T cells were transfected with FC $\gamma$ RII and 4xFlag-Rab33 for 24 h. Bacteria of indicated  
544 Legionella strains were mixed with rabbit anti-legionella antibodies (1:500) at 37°C for 20 min.  
545 Cells were then infected with *L. pneumophila* strains at an MOI of 10 for 2 hours.

546

547 **Acknowledgement**

548 This work is supported by National Institute of Health grant 5R01GM116964 (Y.M). This research  
549 used resources AMX 17-ID-1 of the National Synchrotron Light Source II, a U.S. Department of  
550 Energy (DOE) Office of Science User Facility operated for the DOE Office of Science by  
551 Brookhaven National Laboratory under Contract No. DE-SC0012704. The Life Science  
552 Biomedical Technology Research is primarily supported by the National Institute of Health,  
553 National Institute of General Medical Sciences (NIGMS) through a Biomedical Technology  
554 Research Resource P41 grant (P41GM111244), and by the DOE Office of Biological and  
555 Environmental Research (KP1605010). This investigation was supported by the National Institutes  
556 of Health under Ruth L. Kirschstein National Research Service Award (6T32GM008267) from the  
557 National Institute of General Medical Sciences (to MEM).

558

559 **Author contributions** Alan Sulpizio, Marena Minelli, Min Wan and Yuxin Mao conceived the  
560 general ideas for this work, performed the experiments, and wrote the manuscript. Xiaochun Wu,  
561 Paul Burrows, Ethan Sanford, Jung-Ho Shin, Byron Williams, Michael Goldberg, and Marcus  
562 Smolka contributed ideas and performed experiments.

563

564

565

566 **References**

- 567 Adams, J.A. (2003). Activation loop phosphorylation and catalysis in protein kinases: is there  
568 functional evidence for the autoinhibitor model? *Biochemistry* 42, 601-607.
- 569 Akturk, A., Wasilko, D.J., Wu, X., Liu, Y., Zhang, Y., Qiu, J., Luo, Z.Q., Reiter, K.H., Brzovic,  
570 P.S., Klevit, R.E., *et al.* (2018). Mechanism of phosphoribosyl-ubiquitination mediated by a  
571 single Legionella effector. *Nature* 557, 729-733.
- 572 Alexander, J.E., Hunt, D.F., Lee, M.K., Shabanowitz, J., Michel, H., Berlin, S.C., MacDonald,  
573 T.L., Sundberg, R.J., Rebhun, L.I., and Frankfurter, A. (1991). Characterization of  
574 posttranslational modifications in neuron-specific class III beta-tubulin by mass spectrometry.  
575 *Proc Natl Acad Sci U S A* 88, 4685-4689.
- 576 Baker, N.A., Sept, D., Joseph, S., Holst, M.J., and McCammon, J.A. (2001). Electrostatics of  
577 nanosystems: application to microtubules and the ribosome. *Proc Natl Acad Sci U S A* 98,  
578 10037-10041.
- 579 Bhogaraju, S., Bonn, F., Mukherjee, R., Adams, M., Pfliegerer, M.M., Galej, W.P., Matkovic,  
580 V., Lopez-Mosqueda, J., Kalayil, S., Shin, D., *et al.* (2019). Inhibition of bacterial ubiquitin  
581 ligases by SidJ-calmodulin-catalysed glutamylation. *Nature*.
- 582 Bhogaraju, S., Kalayil, S., Liu, Y., Bonn, F., Colby, T., Matic, I., and Dikic, I. (2016).  
583 Phosphoribosylation of Ubiquitin Promotes Serine Ubiquitination and Impairs Conventional  
584 Ubiquitination. *Cell* 167, 1636-1649 e1613.
- 585 Black, M.H., Osinski, A., Gradowski, M., Servage, K.A., Pawlowski, K., Tomchick, D.R., and  
586 Tagliabracci, V.S. (2019). Bacterial pseudokinase catalyzes protein polyglutamylation to inhibit  
587 the SidE-family ubiquitin ligases. *Science* 364, 787-792.
- 588 Brennan, D.F., Dar, A.C., Hertz, N.T., Chao, W.C., Burlingame, A.L., Shokat, K.M., and  
589 Barford, D. (2011). A Raf-induced allosteric transition of KSR stimulates phosphorylation of  
590 MEK. *Nature* 472, 366-369.

- 591 Brognard, J., and Hunter, T. (2011). Protein kinase signaling networks in cancer. *Curr Opin*  
592 *Genet Dev* *21*, 4-11.
- 593 Cohen, P. (2002). The origins of protein phosphorylation. *Nat Cell Biol* *4*, E127-130.
- 594 Collaborative Computational Project, N. (1994). The CCP4 suite: programs for protein  
595 crystallography. *Acta Cryst D*, 760-763.
- 596 Dong, Y., Mu, Y., Xie, Y., Zhang, Y., Han, Y., Zhou, Y., Wang, W., Liu, Z., Wu, M., Wang, H.,  
597 *et al.* (2018). Structural basis of ubiquitin modification by the Legionella effector SdeA. *Nature*  
598 *557*, 674-678.
- 599 Drum, C.L., Yan, S.Z., Bard, J., Shen, Y.Q., Lu, D., Soelaiman, S., Grabarek, Z., Bohm, A., and  
600 Tang, W.J. (2002). Structural basis for the activation of anthrax adenylyl cyclase exotoxin by  
601 calmodulin. *Nature* *415*, 396-402.
- 602 Edde, B., Rossier, J., Le Caer, J.P., Desbruyeres, E., Gros, F., and Denoulet, P. (1990).  
603 Posttranslational glutamylation of alpha-tubulin. *Science* *247*, 83-85.
- 604 Emsley, P., and Cowtan, K. (2004). Coot: model-building tools for molecular graphics. *Acta*  
605 *Crystallogr D Biol Crystallogr* *60*, 2126-2132.
- 606 Gan, N., Zhen, X., Liu, Y., Xu, X., He, C., Qiu, J., Liu, Y., Fujimoto, G.M., Nakayasu, E.S.,  
607 Zhou, B., *et al.* (2019). Regulation of phosphoribosyl ubiquitination by a calmodulin-dependent  
608 glutamylase. *Nature*.
- 609 Garnham, C.P., Vemu, A., Wilson-Kubalek, E.M., Yu, I., Szyk, A., Lander, G.C., Milligan,  
610 R.A., and Roll-Mecak, A. (2015). Multivalent Microtubule Recognition by Tubulin Tyrosine  
611 Ligase-like Family Glutamylases. *Cell* *161*, 1112-1123.
- 612 Havey, J.C., and Roy, C.R. (2015). Toxicity and SidJ-Mediated Suppression of Toxicity Require  
613 Distinct Regions in the SidE Family of Legionella pneumophila Effectors. *Infect Immun* *83*,  
614 3506-3514.
- 615 Holm, L., and Laakso, L.M. (2016). Dali server update. *Nucleic Acids Res* *44*, W351-355.

- 616 Houdusse, A., Gaucher, J.F., Kremontsova, E., Mui, S., Trybus, K.M., and Cohen, C. (2006).  
617 Crystal structure of apo-calmodulin bound to the first two IQ motifs of myosin V reveals  
618 essential recognition features. *Proc Natl Acad Sci U S A* *103*, 19326-19331.
- 619 Hubber, A., and Roy, C.R. (2010). Modulation of host cell function by *Legionella pneumophila*  
620 type IV effectors. *Annu Rev Cell Dev Biol* *26*, 261-283.
- 621 Isberg, R.R., O'Connor, T.J., and Heidtman, M. (2009). The *Legionella pneumophila* replication  
622 vacuole: making a cosy niche inside host cells. *Nat Rev Microbiol* *7*, 13-24.
- 623 Jacobsen, A.V., and Murphy, J.M. (2017). The secret life of kinases: insights into non-catalytic  
624 signalling functions from pseudokinases. *Biochem Soc Trans* *45*, 665-681.
- 625 Jagemann, L.R., Perez-Rivas, L.G., Ruiz, E.J., Ranea, J.A., Sanchez-Jimenez, F., Nebreda, A.R.,  
626 Alba, E., and Lozano, J. (2008). The functional interaction of 14-3-3 proteins with the ERK1/2  
627 scaffold KSR1 occurs in an isoform-specific manner. *J Biol Chem* *283*, 17450-17462.
- 628 Janke, C., Rogowski, K., and van Dijk, J. (2008). Polyglutamylation: a fine-regulator of protein  
629 function? 'Protein Modifications: beyond the usual suspects' review series. *EMBO Rep* *9*, 636-  
630 641.
- 631 Jeong, K.C., Sexton, J.A., and Vogel, J.P. (2015). Spatiotemporal regulation of a *Legionella*  
632 *pneumophila* T4SS substrate by the metaeffector SidJ. *PLoS Pathog* *11*, e1004695.
- 633 Kalayil, S., Bhogaraju, S., Bonn, F., Shin, D., Liu, Y., Gan, N., Basquin, J., Grumati, P., Luo,  
634 Z.Q., and Dikic, I. (2018). Insights into catalysis and function of phosphoribosyl-linked serine  
635 ubiquitination. *Nature* *557*, 734-738.
- 636 Kim, L., Kwon, D.H., Kim, B.H., Kim, J., Park, M.R., Park, Z.Y., and Song, H.K. (2018).  
637 Structural and Biochemical Study of the Mono-ADP-Ribosyltransferase Domain of SdeA, a  
638 Ubiquitylating/Deubiquitylating Enzyme from *Legionella pneumophila*. *J Mol Biol* *430*, 2843-  
639 2856.
- 640 Kotewicz, K.M., Ramabhadran, V., Sjoblom, N., Vogel, J.P., Haenssler, E., Zhang, M.,  
641 Behringer, J., Scheck, R.A., and Isberg, R.R. (2017). A Single *Legionella* Effector Catalyzes a

- 642 Multistep Ubiquitination Pathway to Rearrange Tubular Endoplasmic Reticulum for Replication.  
643 *Cell Host Microbe* 21, 169-181.
- 644 Kuboniwa, H., Tjandra, N., Grzesiek, S., Ren, H., Klee, C.B., and Bax, A. (1995). Solution  
645 structure of calcium-free calmodulin. *Nat Struct Biol* 2, 768-776.
- 646 Lifshitz, Z., Burstein, D., Peeri, M., Zusman, T., Schwartz, K., Shuman, H.A., Pupko, T., and  
647 Segal, G. (2013). Computational modeling and experimental validation of the Legionella and  
648 Coxiella virulence-related type-IVB secretion signal. *Proc Natl Acad Sci U S A* 110, E707-715.
- 649 Liu, Y., and Luo, Z.Q. (2007). The Legionella pneumophila effector SidJ is required for efficient  
650 recruitment of endoplasmic reticulum proteins to the bacterial phagosome. *Infect Immun* 75,  
651 592-603.
- 652 Manning, G., Whyte, D.B., Martinez, R., Hunter, T., and Sudarsanam, S. (2002). The protein  
653 kinase complement of the human genome. *Science* 298, 1912-1934.
- 654 McDade, J.E., Shepard, C.C., Fraser, D.W., Tsai, T.R., Redus, M.A., and Dowdle, W.R. (1977).  
655 Legionnaires' disease: isolation of a bacterium and demonstration of its role in other respiratory  
656 disease. *N Engl J Med* 297, 1197-1203.
- 657 McKinney, R.M., Porschen, R.K., Edelstein, P.H., Bissett, M.L., Harris, P.P., Bondell, S.P.,  
658 Steigerwalt, A.G., Weaver, R.E., Ein, M.E., Lindquist, D.S., *et al.* (1981). Legionella  
659 longbeachae species nova, another etiologic agent of human pneumonia. *Ann Intern Med* 94,  
660 739-743.
- 661 Meador, W.E., Means, A.R., and Quijcho, F.A. (1992). Target enzyme recognition by  
662 calmodulin: 2.4 Å structure of a calmodulin-peptide complex. *Science* 257, 1251-1255.
- 663 Mukherjee, S., Liu, X., Arasaki, K., McDonough, J., Galan, J.E., and Roy, C.R. (2011).  
664 Modulation of Rab GTPase function by a protein phosphocholine transferase. *Nature* 477, 103-  
665 106.

- 666 Muller, M.P., Peters, H., Blumer, J., Blankenfeldt, W., Goody, R.S., and Itzen, A. (2010). The  
667 Legionella effector protein DrrA AMPylates the membrane traffic regulator Rab1b. *Science* 329,  
668 946-949.
- 669 Murshudov, G.N., Vagin, A.A., and Dodson, E.J. (1997). Refinement of macromolecular  
670 structures by the maximum-likelihood method. *Acta Crystallogr D Biol Crystallogr* 53, 240-255.
- 671 Neunuebel, M.R., Chen, Y., Gaspar, A.H., Backlund, P.S., Jr., Yergey, A., and Machner, M.P.  
672 (2011). De-AMPylation of the small GTPase Rab1 by the pathogen *Legionella pneumophila*.  
673 *Science* 333, 453-456.
- 674 Otwinowski, Z., and Minor, W. (1997). Processing of X-ray diffraction data collected in  
675 oscillation mode. *Methods Enzymol* 276, 307-326.
- 676 Pape, T., and Schneider, T.R. (2004). HKL2MAP: a graphical user interface for macromolecular  
677 phasing with SHELX programs. *J Appl Cryst* 37, 843-844.
- 678 Qiu, J., Sheedlo, M.J., Yu, K., Tan, Y., Nakayasu, E.S., Das, C., Liu, X., and Luo, Z.Q. (2016).  
679 Ubiquitination independent of E1 and E2 enzymes by bacterial effectors. *Nature* 533, 120-124.
- 680 Qiu, J., Yu, K., Fei, X., Liu, Y., Nakayasu, E.S., Piehowski, P.D., Shaw, J.B., Puvar, K., Das, C.,  
681 Liu, X., *et al.* (2017). A unique deubiquitinase that deconjugates phosphoribosyl-linked protein  
682 ubiquitination. *Cell Res* 27, 865-881.
- 683 Redeker, V., Melki, R., Prome, D., Le Caer, J.P., and Rossier, J. (1992). Structure of tubulin C-  
684 terminal domain obtained by subtilisin treatment. The major alpha and beta tubulin isotypes from  
685 pig brain are glutamylated. *FEBS Lett* 313, 185-192.
- 686 Rhoads, A.R., and Friedberg, F. (1997). Sequence motifs for calmodulin recognition. *FASEB J*  
687 11, 331-340.
- 688 Rubin, G.M., Yandell, M.D., Wortman, J.R., Gabor Miklos, G.L., Nelson, C.R., Hariharan, I.K.,  
689 Fortini, M.E., Li, P.W., Apweiler, R., Fleischmann, W., *et al.* (2000). Comparative genomics of  
690 the eukaryotes. *Science* 287, 2204-2215.



- 691 Rudiger, M., Plessman, U., Kloppel, K.D., Wehland, J., and Weber, K. (1992). Class II tubulin,  
692 the major brain beta tubulin isotype is polyglutamylated on glutamic acid residue 435. *FEBS Lett*  
693 *308*, 101-105.
- 694 Scheeff, E.D., Eswaran, J., Bunkoczi, G., Knapp, S., and Manning, G. (2009). Structure of the  
695 pseudokinase VRK3 reveals a degraded catalytic site, a highly conserved kinase fold, and a  
696 putative regulatory binding site. *Structure* *17*, 128-138.
- 697 Segal, G., Purcell, M., and Shuman, H.A. (1998). Host cell killing and bacterial conjugation  
698 require overlapping sets of genes within a 22-kb region of the *Legionella pneumophila* genome.  
699 *Proc Natl Acad Sci U S A* *95*, 1669-1674.
- 700 Shaw, A.S., Kornev, A.P., Hu, J., Ahuja, L.G., and Taylor, S.S. (2014). Kinases and  
701 pseudokinases: lessons from RAF. *Mol Cell Biol* *34*, 1538-1546.
- 702 Sievers, F., Wilm, A., Dineen, D., Gibson, T.J., Karplus, K., Li, W., Lopez, R., McWilliam, H.,  
703 Remmert, M., Soding, J., *et al.* (2011). Fast, scalable generation of high-quality protein multiple  
704 sequence alignments using Clustal Omega. *Mol Syst Biol* *7*, 539.
- 705 Sreelatha, A., Yee, S.S., Lopez, V.A., Park, B.C., Kinch, L.N., Pilch, S., Servage, K.A., Zhang,  
706 J., Jiou, J., Karasiewicz-Urbanska, M., *et al.* (2018). Protein AMPylation by an Evolutionarily  
707 Conserved Pseudokinase. *Cell* *175*, 809-821 e819.
- 708 Szyk, A., Deaconescu, A.M., Piszczek, G., and Roll-Mecak, A. (2011). Tubulin tyrosine ligase  
709 structure reveals adaptation of an ancient fold to bind and modify tubulin. *Nat Struct Mol Biol*  
710 *18*, 1250-1258.
- 711 Tan, Y., Arnold, R.J., and Luo, Z.Q. (2011). *Legionella pneumophila* regulates the small GTPase  
712 Rab1 activity by reversible phosphorylcholation. *Proc Natl Acad Sci U S A* *108*, 21212-21217.
- 713 Tan, Y., and Luo, Z.Q. (2011). *Legionella pneumophila* SidD is a deAMPyase that modifies  
714 Rab1. *Nature* *475*, 506-509.

715 Urbanus, M.L., Quaile, A.T., Stogios, P.J., Morar, M., Rao, C., Di Leo, R., Evdokimova, E.,  
716 Lam, M., Oatway, C., Cuff, M.E., *et al.* (2016). Diverse mechanisms of metaeffector activity in  
717 an intracellular bacterial pathogen, *Legionella pneumophila*. *Mol Syst Biol* *12*, 893.

718 van Dijk, J., Miro, J., Strub, J.M., Lacroix, B., van Dorsselaer, A., Edde, B., and Janke, C.  
719 (2008). Polyglutamylation is a post-translational modification with a broad range of substrates. *J*  
720 *Biol Chem* *283*, 3915-3922.

721 van Dijk, J., Rogowski, K., Miro, J., Lacroix, B., Edde, B., and Janke, C. (2007). A targeted  
722 multienzyme mechanism for selective microtubule polyglutamylation. *Mol Cell* *26*, 437-448.

723 Villa, F., Capasso, P., Tortorici, M., Forneris, F., de Marco, A., Mattevi, A., and Musacchio, A.  
724 (2009). Crystal structure of the catalytic domain of Haspin, an atypical kinase implicated in  
725 chromatin organization. *Proc Natl Acad Sci U S A* *106*, 20204-20209.

726 Vogel, J.P., Andrews, H.L., Wong, S.K., and Isberg, R.R. (1998). Conjugative transfer by the  
727 virulence system of *Legionella pneumophila*. *Science* *279*, 873-876.

728 Wan, M., Sulpizio, A., Akturk, A., Beck, W.H.J., Lanz, M., Smolka, M.B., Vogel, J.P., and Mao,  
729 Y. (2019). Deubiquitination of phosphoribosyl-ubiquitin conjugates by PDE domain-containing  
730 *Legionella* effectors. unpublished.

731 Wang, Y., Shi, M., Feng, H., Zhu, Y., Liu, S., Gao, A., and Gao, P. (2018). Structural Insights  
732 into Non-canonical Ubiquitination Catalyzed by SidE. *Cell* *173*, 1231-1243 e1216.

733 Zeqiraj, E., Filippi, B.M., Goldie, S., Navratilova, I., Boudeau, J., Deak, M., Alessi, D.R., and  
734 van Aalten, D.M. (2009). ATP and MO25alpha regulate the conformational state of the  
735 STRADalpha pseudokinase and activation of the LKB1 tumour suppressor. *PLoS Biol* *7*,  
736 e1000126.

737 Zhu, W., Banga, S., Tan, Y., Zheng, C., Stephenson, R., Gately, J., and Luo, Z.Q. (2011).  
738 Comprehensive identification of protein substrates of the Dot/Icm type IV transporter of  
739 *Legionella pneumophila*. *PLoS One* *6*, e17638.

740

741 **Figures**

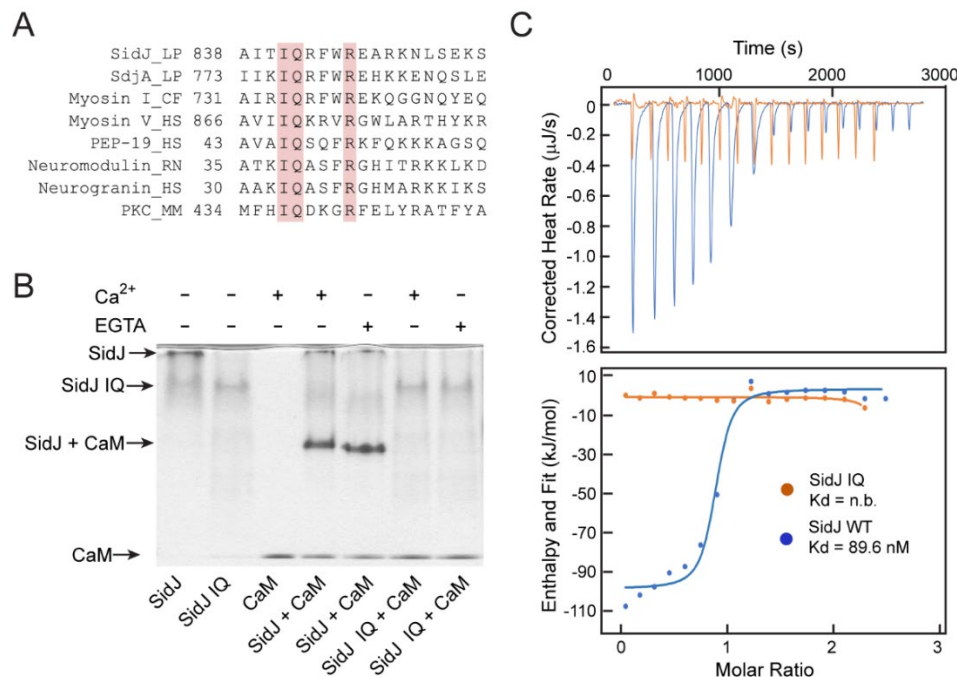

742

743 **Figure 1. SidJ Binds CaM through its C-terminal IQ Motif.** (A) Multiple sequence alignment of

744 IQ motifs (“IQXXXR”) mediating the binding of CaM from the indicated proteins. Protein names are listed

745 followed by a two-letter representation of the species and the residue numbers of the first amino acid in the

746 aligned sequences. Identical residues of the motif are highlighted in salmon. Entrez database accession

747 numbers are as follows: SidJ, YP\_096168.1; SdjA, YP\_096515.1; Myosin-1, ONH68659.1; Myosin V,

748 NP\_000250.3; PEP-19, CAA63724.1; Neuromodulin, NP\_058891.1; Neurogranin, NP\_006167.1; Protein

749 kinase C delta isoform, NP\_001297611.1. LP: *Legionella pneumophila*; CF: *Cyberlindnera fabianii*; HS:

750 *Homo sapiens*; RN: *Rattus norvegicus*; MM: *Mus musculus*. (B) Native PAGE analysis of the SidJ and

751 CaM complex. Wild type SidJ and CaM form a complex independent of Ca<sup>2+</sup> and the complex migrates at

752 a different position from each individual protein. (C) Isothermal titration calorimetry measurement of

753 the affinity between CaM and SidJ WT (blue) or SidJ IQ mutant (orange). The top panel shows

754 the reconstructed thermogram, and the bottom panel the isotherms. SidJ WT binding to CaM has

755 a dissociation constant of approximately 89.6 nM in a 1:1 stoichiometry.

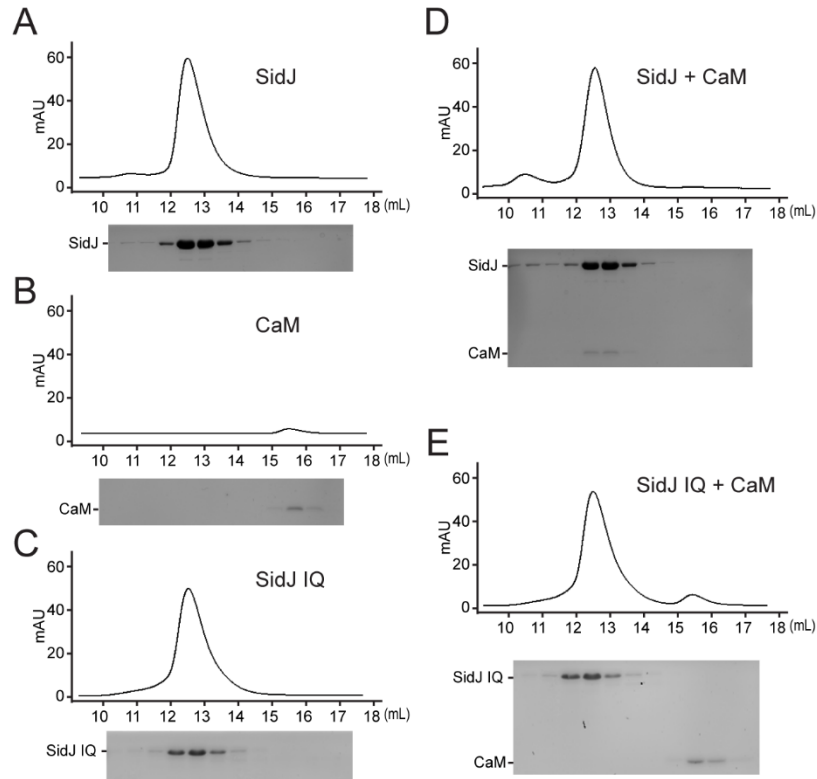

756

757 **Figure 1—figure supplement 1. Size exclusion chromatography analysis of SidJ and CaM**

758 **complex.** (A-E) Size exclusion chromatogram profile of purified recombinant protein (top) and

759 the peak fractions were visualized by SDS-PAGE followed by Coomassie staining (bottom). (A)

760 SidJ; (B) CaM; (C) SidJ IQ mutant; (D) SidJ and CaM; and (E) SidJ IQ mutant and CaM.

761

762

763

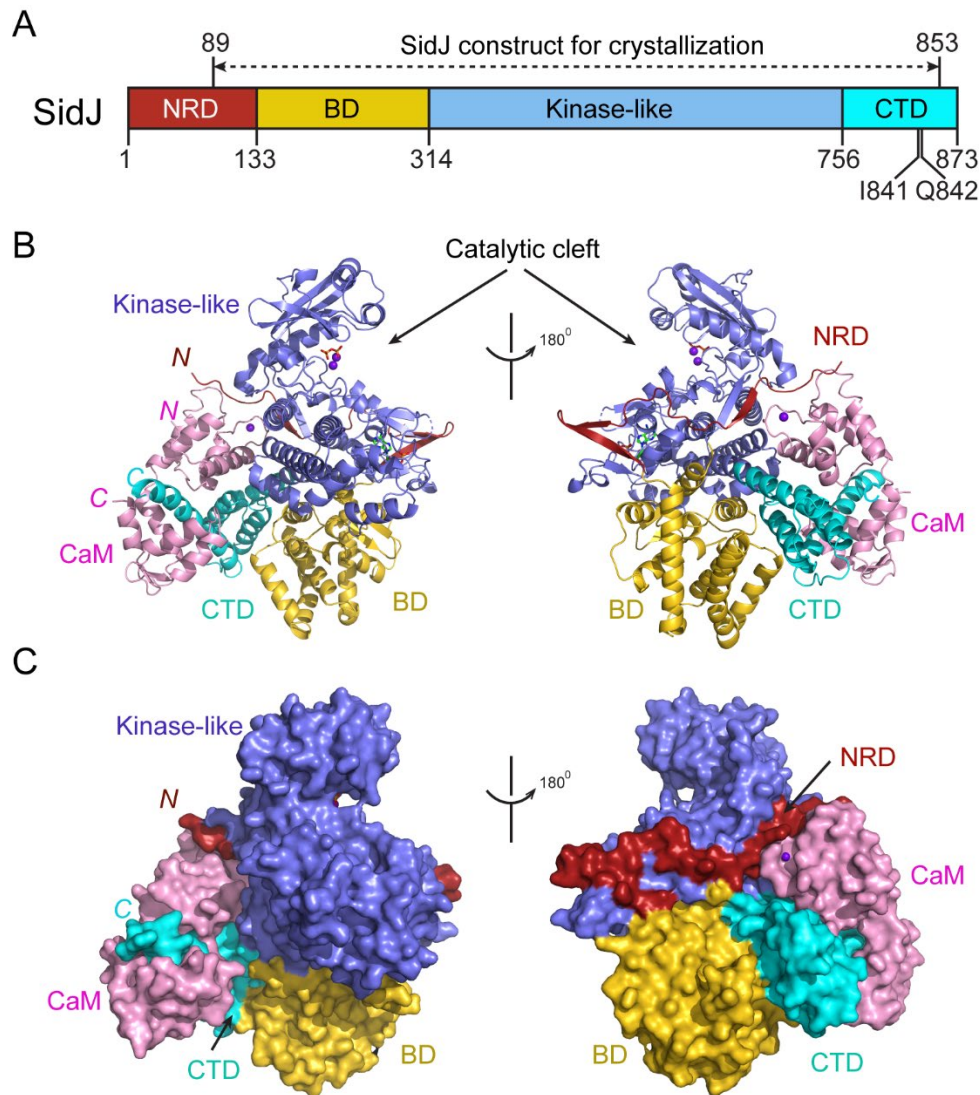

764

765 **Figure 2. Overall structure of the SidJ and CaM complex.** (A) Schematic diagram of SidJ  
766 domain architecture. SidJ is comprised of a N-terminal regulatory domain (NRD) in maroon, a  
767 Base domain (BD) in yellow, kinase-like catalytic domain in blue, and a C-terminal domain (CTD)  
768 in cyan. The construct used for crystallography (89-853) is depicted above the schematic. (B)  
769 Overall structure of SidJ bound to CaM in a cartoon representation. SidJ structure is colored with  
770 the same scheme as in (A) and CaM is colored in pink. Ca<sup>2+</sup> ions are depicted as purple spheres.  
771 The kinase-like domain of SidJ has a bilobed structure with two Ca<sup>2+</sup> ions and a pyrophosphate

772 molecule bound at the catalytic cleft between the two lobes. Right panel: 180° rotation of left panel  
773 and depicts the NRD domain contacts with CaM. (C) Molecular surface representation of SidJ  
774 bound to CaM in the same orientation and coloring as in (B). Right panel: 180° rotation of the left  
775 panel. Note that the NRD meanders on the surface of the kinase-like domain and mediates the  
776 contact between the kinase-like domain and CaM.

777

778

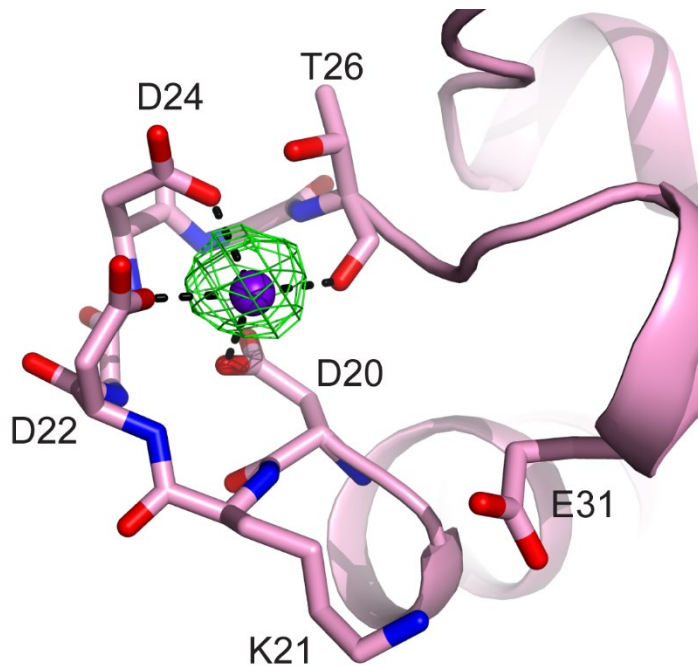

779

780

781 **Figure 2—figure supplement 1. CaM EF-hand coordinated with one Ca<sup>2+</sup>.** CaM is  
782 represented as pink cartoon with the residues that coordinate with the Ca<sup>2+</sup> ion are shown as sticks.  
783 Green mesh represents F<sub>o</sub>-F<sub>c</sub> difference map contoured to 3σ. Note that the conserved residue E31,  
784 which is responsible for chelation at the -Z coordination position in Ca<sup>2+</sup> fully chelated CaM is  
785 shifted away from the Ca<sup>2+</sup>, indicating a weak Ca<sup>2+</sup> binding to the CaM in the SidJ-CaM complex.

786

787

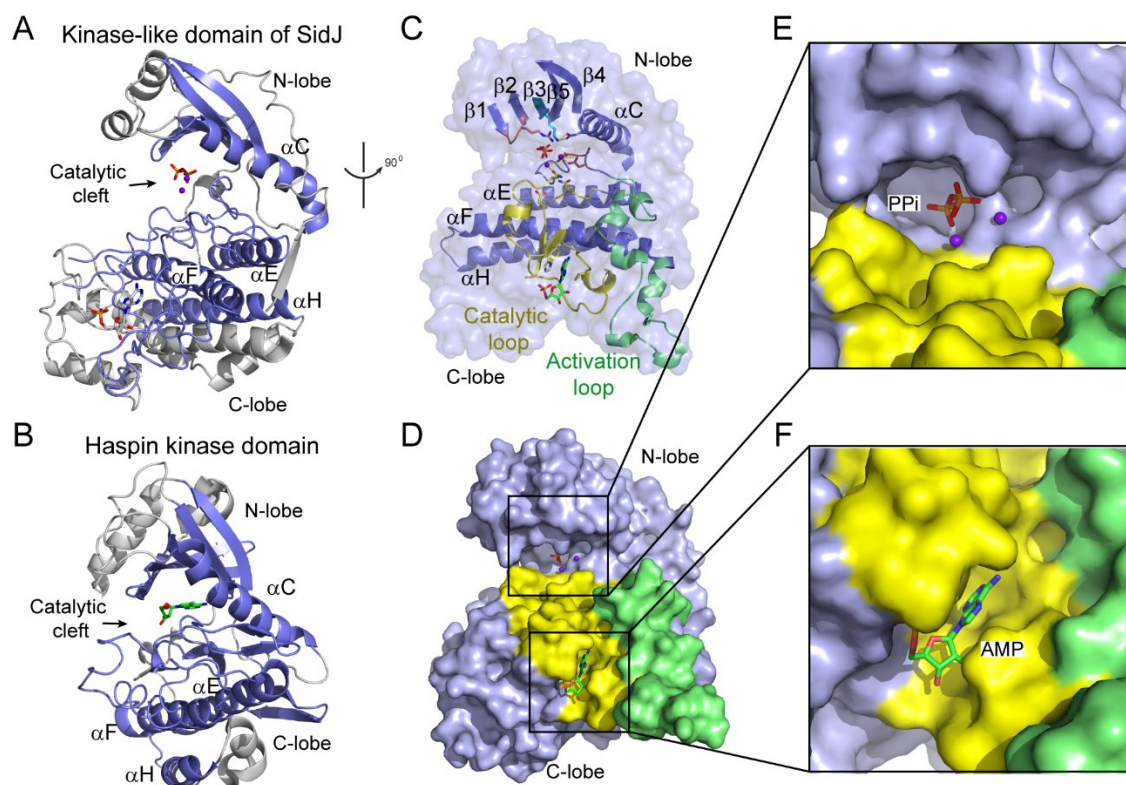

788

789

790 **Figure 3. The core of SidJ adopts a protein kinase fold.** (A) Cartoon diagram of the kinase-like  
791 domain of SidJ. Secondary structure elements that are conserved in protein kinases are colored in  
792 blue.  $\text{Ca}^{2+}$  ions are shown as purple spheres while the pyrophosphate and AMP molecules are  
793 shown in sticks. (B) Cartoon representation of the kinase domain of Haspin kinase (PDB ID:  
794 2WB6). The conserved structural core colored in blue is displayed with a similar orientation to  
795 (A). (C) An orthogonal view of the conserved secondary structural elements in the SidJ kinase-  
796 like domain. The N-lobe is comprised of five antiparallel  $\beta$ -strands and  $\alpha\text{C}$  helix. The C-lobe is  
797 primarily  $\alpha$  helical. Secondary structural features are named according to PKA nomenclature. The  
798 activation loop is colored in green, the catalytic loop in yellow, and the glycine rich loop in salmon.  
799 Conserved residues within the kinase-like catalytic cleft are shown in sticks. (D) Surface



800 representation of the SidJ kinase-like domain, depicting the catalytic cleft formed between the N-  
801 and C-lobes and the migrated nucleotide binding site formed mainly by residues within the  
802 catalytic loop (yellow). The activation loop (green) makes close contact with the catalytic loop.  
803 (E) Zoom-in view of catalytic clefts outlined in (D). The kinase catalytic cleft contains two  $\text{Ca}^{2+}$   
804 ions and a pyrophosphate ( $\text{PP}_i$ ) molecule. (F) Expanded view of migrated nucleotide binding  
805 pocket bound with an AMP.

806

807

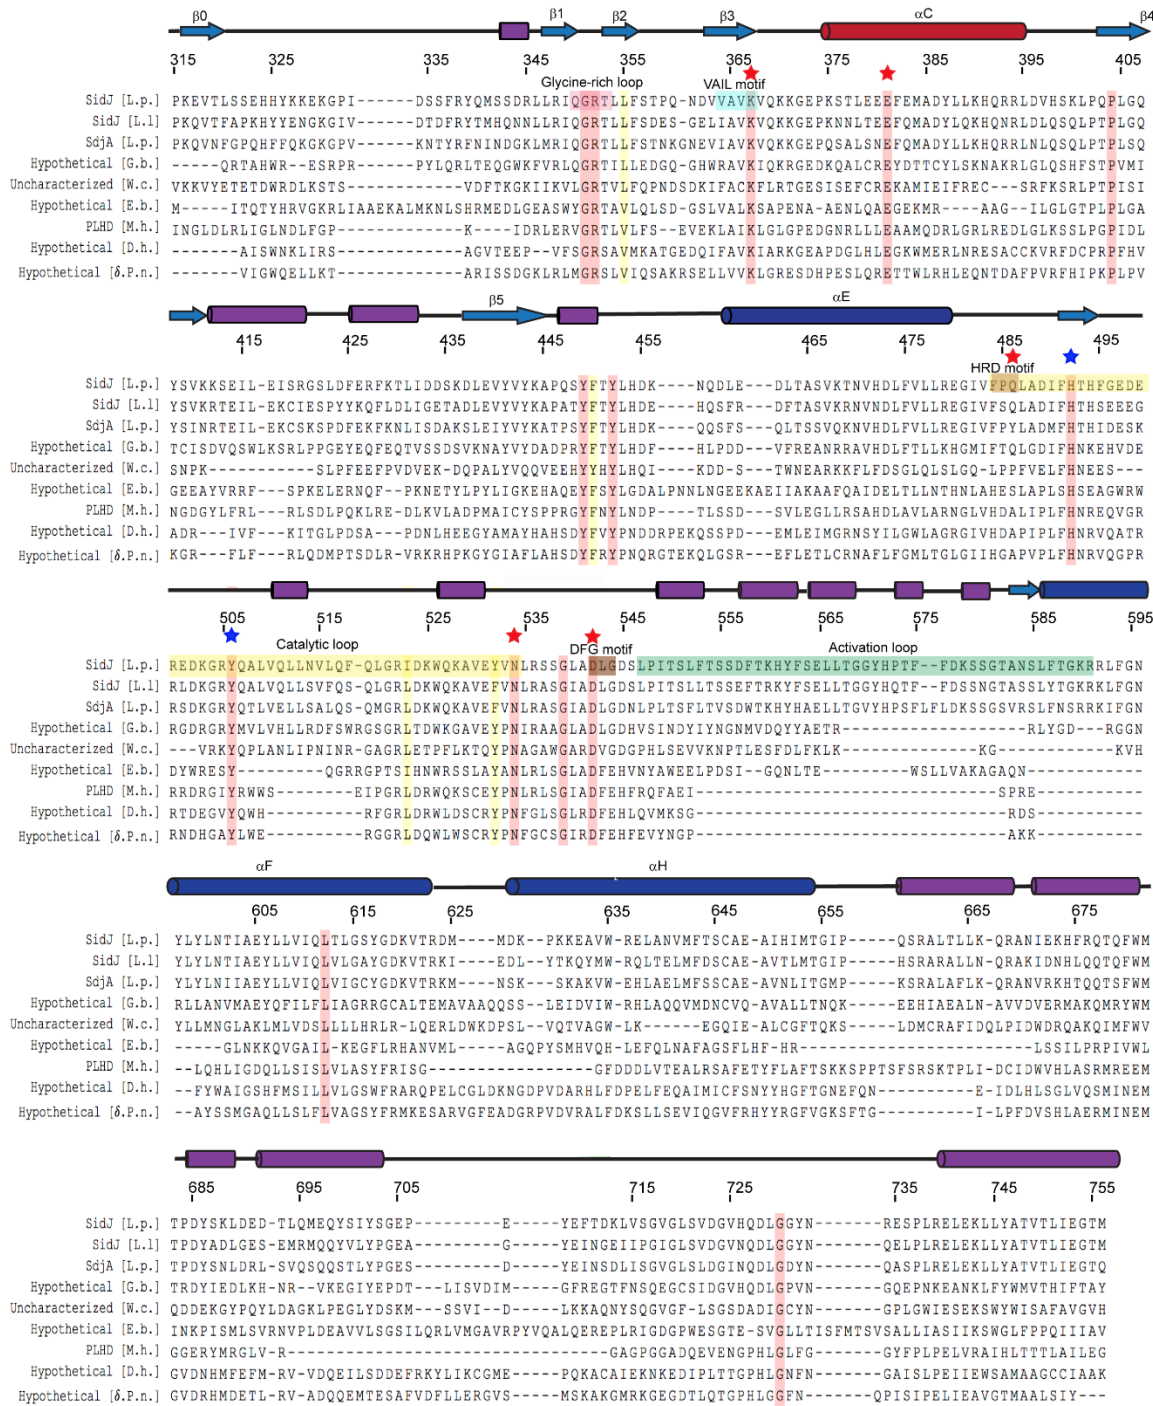

808

809 **Figure 3—figure supplement 1. Multiple sequence alignment of SidJ kinase-like domain**

810 **homologues. The NCBI BLAST server was used to identify homologous proteins to SidJ.**

811 Sequences corresponding to the kinase-like domain of SidJ (315-756) were aligned by Clustal

812 Omega and colored using the MultAlin server (<http://www.bioinformatics.org/sms/index.html>).

813 SidJ residue numbers are marked above the alignment with secondary structural elements drawn

814 above. Identical residues are highlighted in red and similar residues in yellow. Kinase catalytic

815 residues located in the active site are marked with red stars, while residues at the migrated-

816 nucleotide binding pocket are marked with blue stars. Conserved kinase motifs are highlighted as

817 follows: glycine-rich loop (red), VAIK motif (blue), HRD motif (gold), catalytic loop (yellow),

818 DFG motif (brown) and activation loop (green). NCBI Accession numbers are as follows: SidJ

819 *Legionella pneumophila*, AAU28221; SidJ *Legionella longbeachae*, RZV23241; SdjA *Legionella*

820 *pneumophila*, AAU28568; hypothetical protein A3E83\_09250, *Gammaproteobacteria bacterium*

821 *RIFCSPHIGHO2\_12\_Full\_41\_20*, OGT46295.1; Putative uncharacterized protein, *Waddlia*

822 *chondrophila* 2032/99, CCB91008.1; Hypothetical protein COB53\_07685, *Elusimicrobia*

823 *bacterium*, PCI37048.1; PBS lyase HEAT domain protein repeat-containing protein,

824 *Methanosaeta harundinacea* KUK97762.1; Hypothetical protein, *Desulfovibrio hydrothermalis*

825 WP\_015335088.1; Hypothetical protein, *Delta proteobacterium NaphS2*, WP\_006420030.1.

826

827

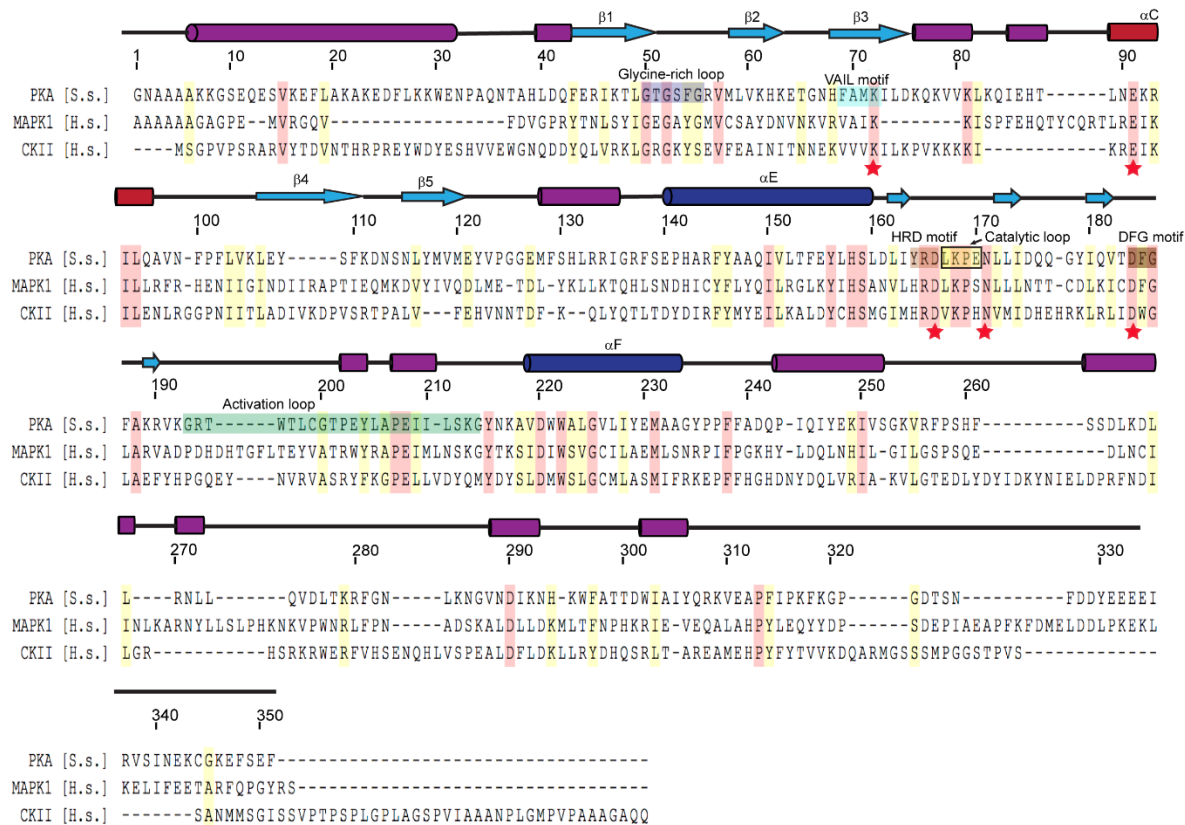

828

829 **Figure 3—figure supplement 2. Multiple sequence alignment of representative protein**  
 830 **kinases.** The secondary structure of PKA is labeled above the sequence, and PKA residue numbers  
 831 are marked on the top of the alignment. Identical residues are highlighted in red and similar  
 832 residues in yellow. Kinase catalytic residues are marked with red stars and conserved kinase  
 833 signature motifs are highlighted in a similar color scheme to SidJ kinase-like domain. Note that  
 834 the catalytic loop in protein kinase contains only 4 amino acids, while the catalytic loop of SidJ is  
 835 comprised of a large insertion (> 40 amino acids, Figure 3- Figure supplement 1). Accession  
 836 numbers are as follows: cAMP-dependent protein kinase catalytic subunit alpha, *Sus scrofa*,  
 837 P36887.4; Mitogen-activated protein kinase, *Homo sapiens*, P28482; Casein kinase II subunit  
 838 alpha, *Homo sapiens*, P68400.

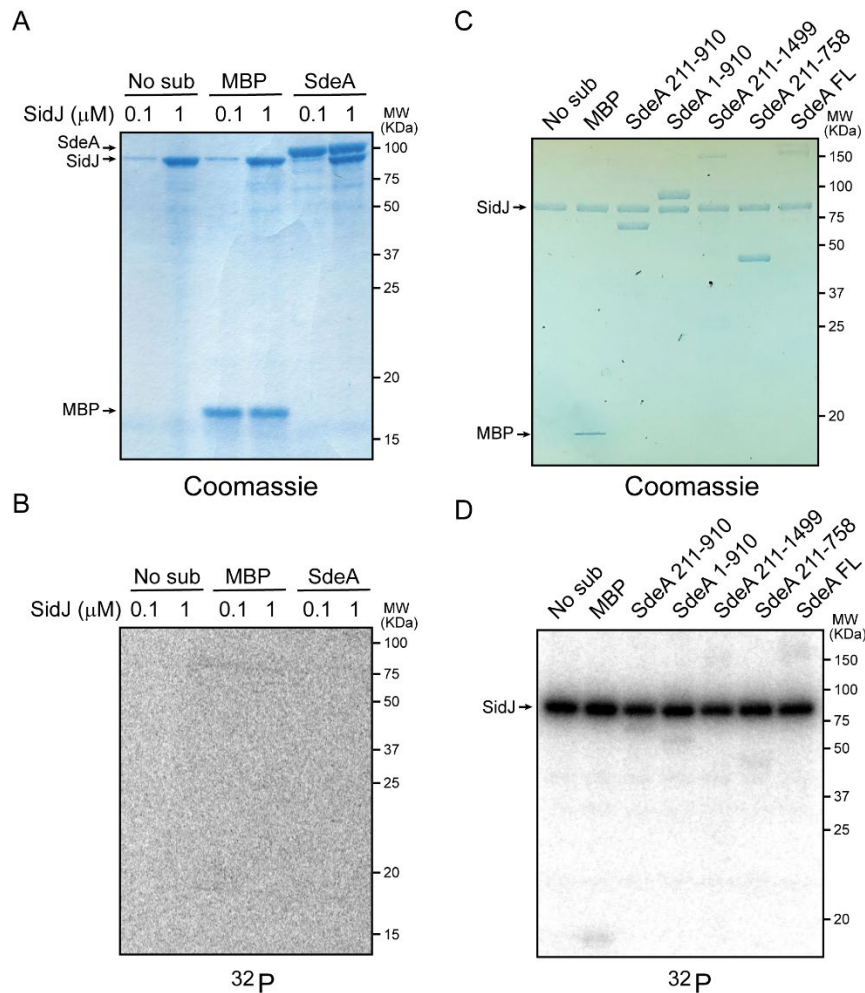

839

840 **Figure 3—figure supplement 3. SidJ lacks canonical kinase activity but exhibits auto-**  
841 **AMPylation activity.** (A) Two concentrations of SidJ 0.1  $\mu$ M and 1  $\mu$ M were incubated with CaM,  
842 MgCl<sub>2</sub> and [ $\gamma$ -<sup>32</sup>P]ATP without substrate, with MBP, and with SdeA 1-910 for 30 minutes at 37°C.  
843 Proteins were separated by 12% SDS-PAGE and visualized with Coomassie stain. (B)  
844 Autoradiogram of gel shown in (A). Exposure time: 2 hours. (C) SidJ was incubated with CaM,  
845 MgCl<sub>2</sub> and [ $\alpha$ -<sup>32</sup>P]ATP without substrate, with MBP, and indicated recombinant SdeA truncations.  
846 Proteins were separated by 8% SDS-PAGE and visualized with Coomassie stain. (D)  
847 Autoradiogram of gel shown in (C). Exposure time: 1 hour. The bands corresponding to SidJ  
848 showed strong radiographic signals, indicating auto-AMPylation of SidJ.

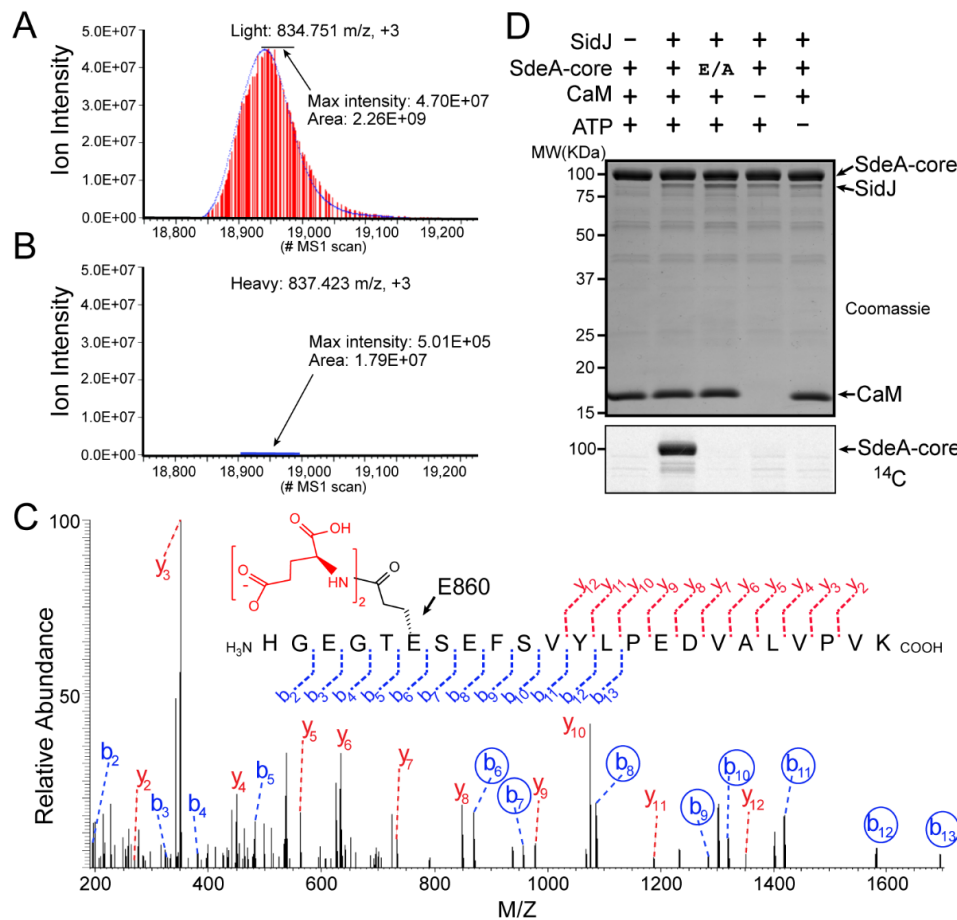

849

850 **Figure 4. SidJ catalyzes polyglutamylation of SdeA.** Reconstructed ion chromatograms for the  
 851 SdeA peptide (residues 855-877) from (A) cells grown in light medium and co-transfected with  
 852 GFP-SdeA and mCherry vector control or (B) cells grown in heavy medium and co-transfected  
 853 with GFP-SdeA and mCherry-SidJ. (C) MS2 spectrum of a di-glutamylated SdeA mART peptide  
 854 with b ions labeled in blue and y ions labeled in red. The peptide sequence corresponding to  
 855 fragmentation is depicted above the spectrum. Circled B ions represent a mass increase  
 856 corresponding to diglutamylation (258.085 Da). (D) In vitro glutamylation of SdeA with [U-  
 857 <sup>14</sup>C]Glutamate. E/A corresponds to the E860A point mutant of SdeA. Proteins were separated by  
 858 SDS-PAGE and visualized with Coomassie stain (top panel) and autoradiogram of the gel is shown  
 859 in bottom panel.

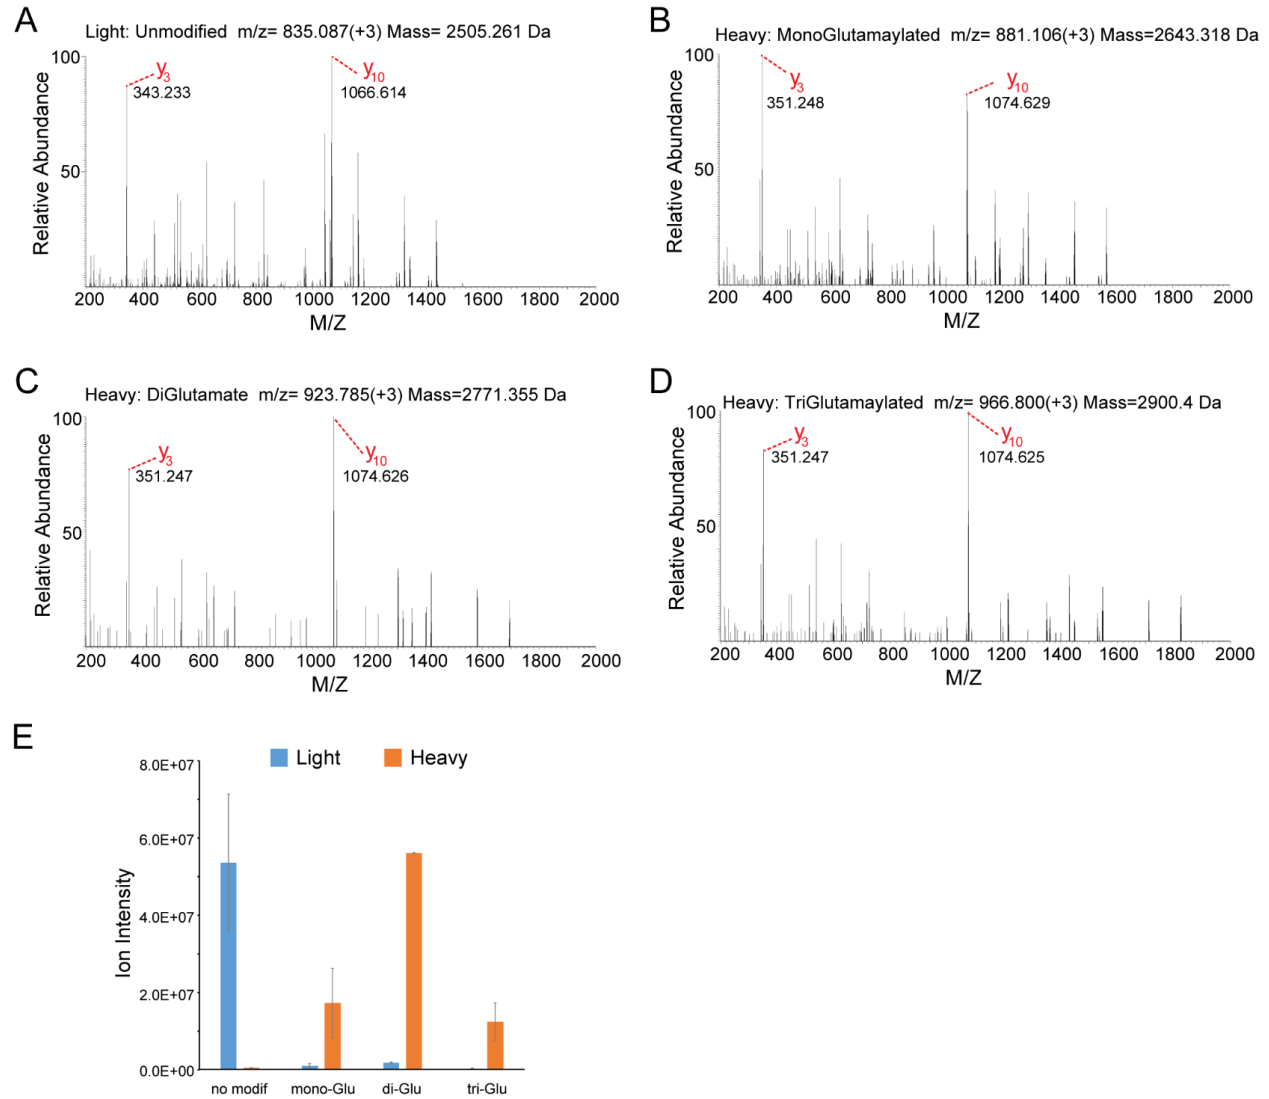

860

861 **Figure 4—figure supplement 1. MS/MS analysis of the SdeA peptide modified by SidJ. (A)**

862 The MS2 spectrum of the SdeA peptide (residues 855-877, prepared from light medium) displays

863 two signature ions,  $Y_3$  and  $Y_{10}$  ions, which correspond to the two Y ions generated from two

864 labile prolines in the peptide. (B) A SdeA peptide (prepared from heavy medium) exhibits the

865 same two signature ions ( $Y_3$  and  $Y_{10}$ ) but with a mass increase of 129.043 Da after subtraction of

866 8.014 Da corresponding to the heavy Lys and 1 Da corresponding to natural  $^{13}\text{C}$  incorporation in

867 the peptide. The 129.043 Da corresponds to the addition of a glutamate residue. (C) A similar

868 SdeA peptide (prepared from heavy medium) produces  $Y_3$  and  $Y_{10}$  ions, but with a mass increase

869 of 2 x 129.043 Da after accounting for the heavy Lys. (D) A SdeA peptide (prepared from heavy  
870 medium) exhibits the same two signature ions (Y3 and Y10) but with a mass increase of 3 x  
871 129.046 Da. (E) Quantification of ion intensity for heavy and light samples of unmodified, mono-  
872 glutamylated, di-glutamylated, and tri-glutamylated SdeA mART peptides. Data are shown as  
873 means  $\pm$  STD of three independent mass spectrometry data collections.

874

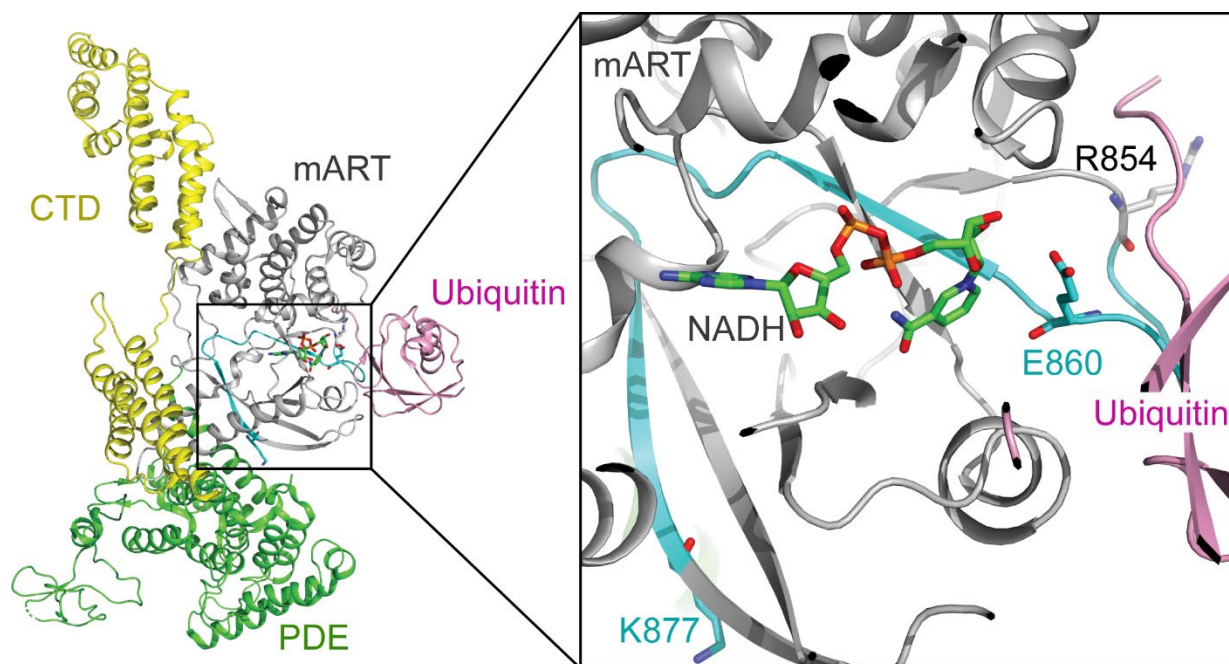

875

876 **Figure 4—figure supplement 2. The structural context of the SdeA peptide modified by SidJ.**

877 Left: Overall structure of SdeA in complex with Ub and NADH (PDB ID: 5YIJ). Right: enlarged  
878 view of the mART active site of SdeA. The peptide (residues 855-877) shown in cyan was  
879 polyglutamylated at residue E860 (shown in sticks) by SidJ as detected by MS/MS analysis. The  
880 NADH displayed in sticks and colored in green.

881



882

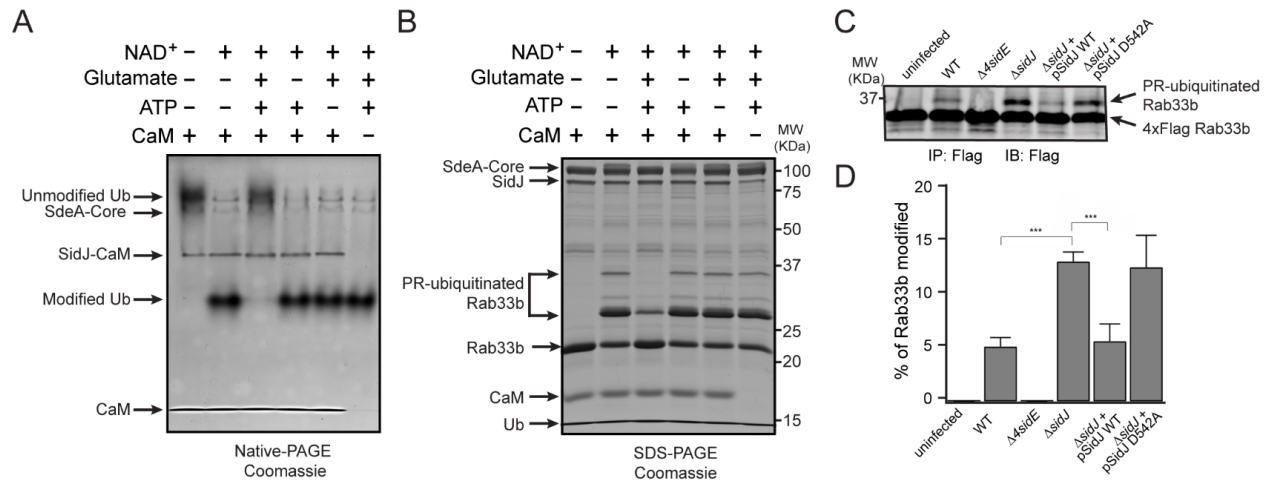

883

884 **Figure 5. SidJ suppresses the PR-ubiquitination activity of SdeA.** (A) SdeA Core was first  
 885 incubated with SidJ for 30 minutes at 37°C with MgCl<sub>2</sub>, ATP, CaM, and in the presence or absence  
 886 of glutamate. Then the SdeA mediated ADP-ribosylation of Ub was initiated by addition of Ub  
 887 and NAD<sup>+</sup> to the reaction mixture and further incubated for 30 minutes at 37°C. Final products  
 888 were analyzed by Native PAGE to monitor the modification of Ub as an indirect readout for the  
 889 polyglutamylation activity of SidJ. (B) In vitro SdeA PR-ubiquitination of Rab33b after a similar  
 890 pretreatment by SidJ as in (A). The final products were analyzed by SDS-PAGE to monitor the  
 891 generation of PR-ubiquitinated Rab33b. (C) PR-ubiquitination of Rab33b was increased in cells  
 892 infected with  $\Delta$ sidJ *L. pneumophila* strain. HEK293T cells expressing FC $\gamma$ RII and 4xFlag-Rab33b  
 893 were infected with indicated *L. pneumophila* strains for 2 hours. 4xFlag-Rab33b proteins were  
 894 enriched by anti-Flag immunoprecipitation and analyzed by anti-Flag Western blot. (D)  
 895 Quantification of percentage of PR-ubiquitinated Rab33b in blots in panel C. Data are shown as  
 896 means  $\pm$  SEM of three independent experiments. \*\*\*P<0.001.

897

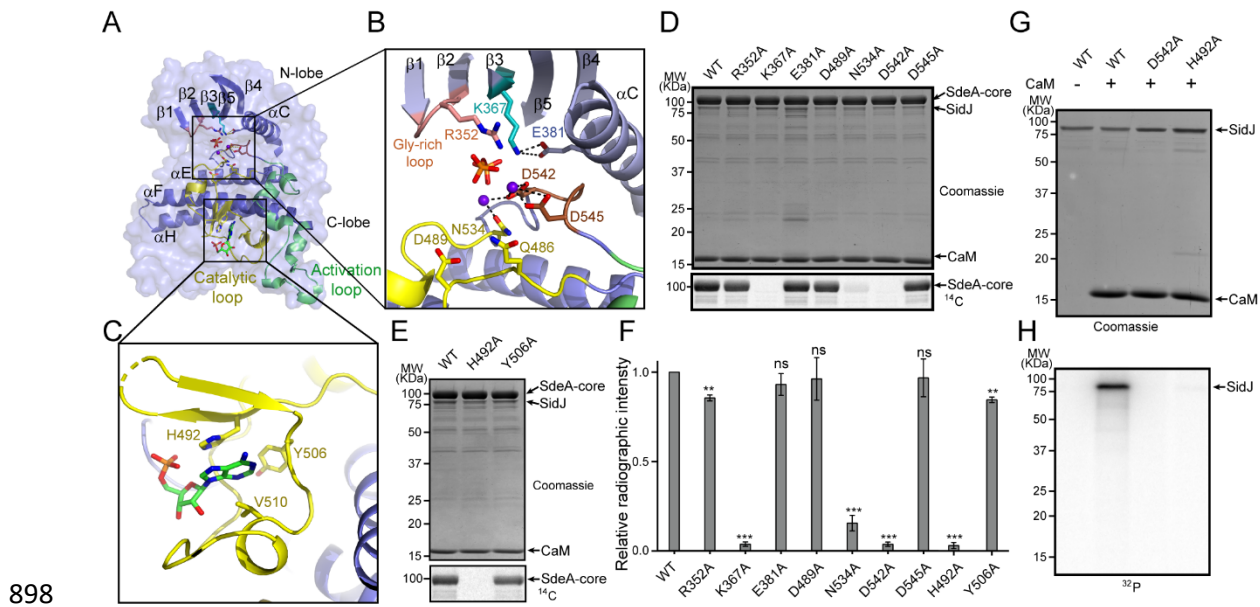

898

899 **Figure 6. Molecular determinants of SidJ-mediated polyglutamylation.** (A) Overall structure  
900 of SidJ kinase-like domain. (B) Enlarged view of kinase catalytic site of SidJ. Key catalytic  
901 residues are displayed in sticks. Pyrophosphate is shown as sticks and two calcium ions are shown  
902 as purple spheres. (C) Enlarged view of “migrated” nucleotide binding site with AMP displayed  
903 as sticks. (D) In vitro glutamylation of SdeA by SidJ active site mutants with [U-<sup>14</sup>C]glutamate  
904 after 15 minute reaction at 37°C. The proteins in the reactions were visualized by SDS-PAGE  
905 followed by Coomassie staining (top panel) and the modification of SdeA was detected by  
906 autoradiography (bottom panel). (E) In vitro glutamylation of SdeA by SidJ nucleotide binding  
907 site mutants with [U-<sup>14</sup>C]glutamate. The proteins in the reactions were analyzed by SDS-PAGE  
908 (top) and the glutamylation of SdeA was detected by autoradiography (bottom). (F) Quantification  
909 of the relative autoradiographic intensity of modified SdeA. Data are shown as means ± STD of  
910 three independent experiments. ns: not significant; \*\*P<0.01; \*\*\*P<0.001. (G) SidJ and SidJ  
911 mutants were incubated with [α-<sup>32</sup>P]ATP and MgCl<sub>2</sub> in the presence or absence of CaM.  
912 Representative SDS-PAGE gel was stained with Coomassie. (H) Autoradiogram of the gel in G  
913 to show the auto-AMPylation of SidJ.

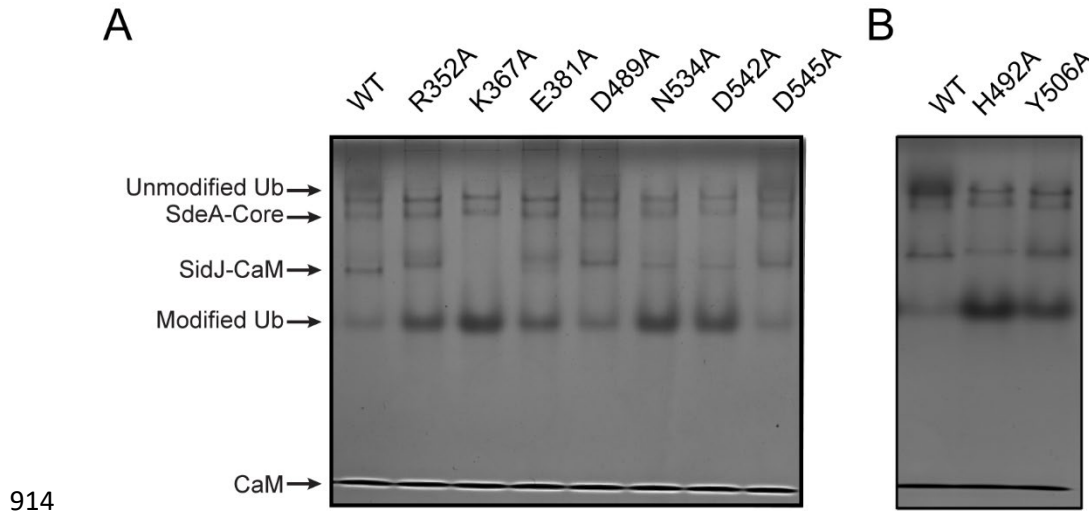

914

915

916 **Figure 6—figure supplement 1. Inhibition of SdeA-catalyzed Ub ADP-ribosylation by SidJ**

917 **mutants.** (A) SdeA core was first treated by SidJ or its kinase active site mutants for 30 minutes

918 at 37 °C. After the treatment, the SdeA mediated ADP-ribosylation of Ub was initiated by addition

919 of Ub and NAD<sup>+</sup> to the reaction mixture and further incubated for 30 minutes at 37°C. Reaction

920 products were analyzed by Native PAGE and visualized with Coomassie stain. (B) The inhibition

921 of SdeA-catalyzed ADP-ribosylation of Ub by SidJ nucleotide binding pocket mutants. The

922 experiments were performed as in A.

923

924

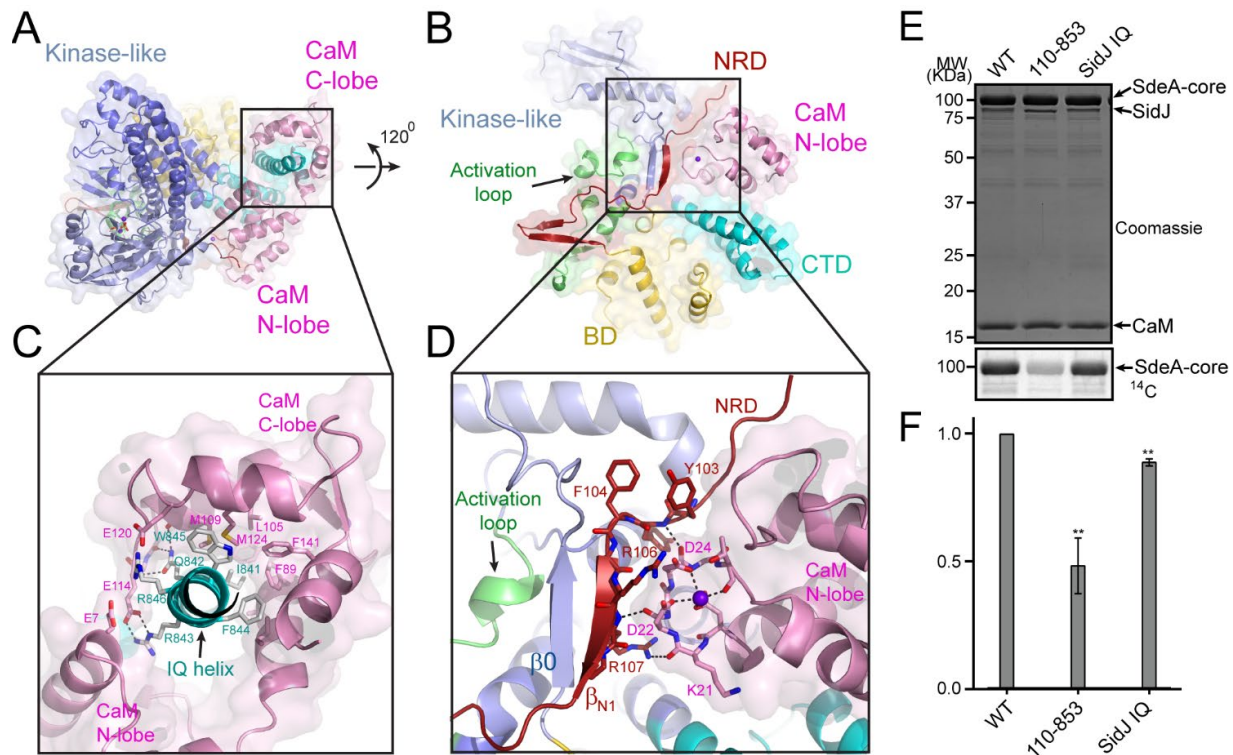

925

926 **Figure 7. Activation of SidJ by CaM.** (A) The structure of the SidJ-CaM complex showing the  
 927 C-lobe of CaM (pink) “gripping” the IQ-motif helix (cyan) of SidJ. (B) A 120° rotated view of the  
 928 complex in panel A showing the N-lobe of CaM contacts with the NRD domain (maroon) of SidJ  
 929 (C) Enlarged view of interface between the SidJ IQ helix and the C-lobe of CaM. Residues  
 930 involved in the interactions between the IQ helix and CaM are depicted as sticks. Hydrogen bonds  
 931 and electrostatic interactions depicted with dashed lines. (D) Enlarged region of interface between  
 932 the NRD and CaM. Purple sphere represents the  $Ca^{2+}$  ion bound to CaM. (E) In vitro glutamylation  
 933 of SdeA by SidJ mutants. The proteins in the reactions were visualized by SDS-PAGE followed  
 934 by Coomassie staining (top panel) and the modification of SdeA was detected by autoradiography  
 935 (bottom panel). (F) Quantification of the relative autoradiographic intensity of modified SdeA.  
 936 Data are shown as means  $\pm$  STD of three independent experiments. \*\* $P < 0.001$ .

937

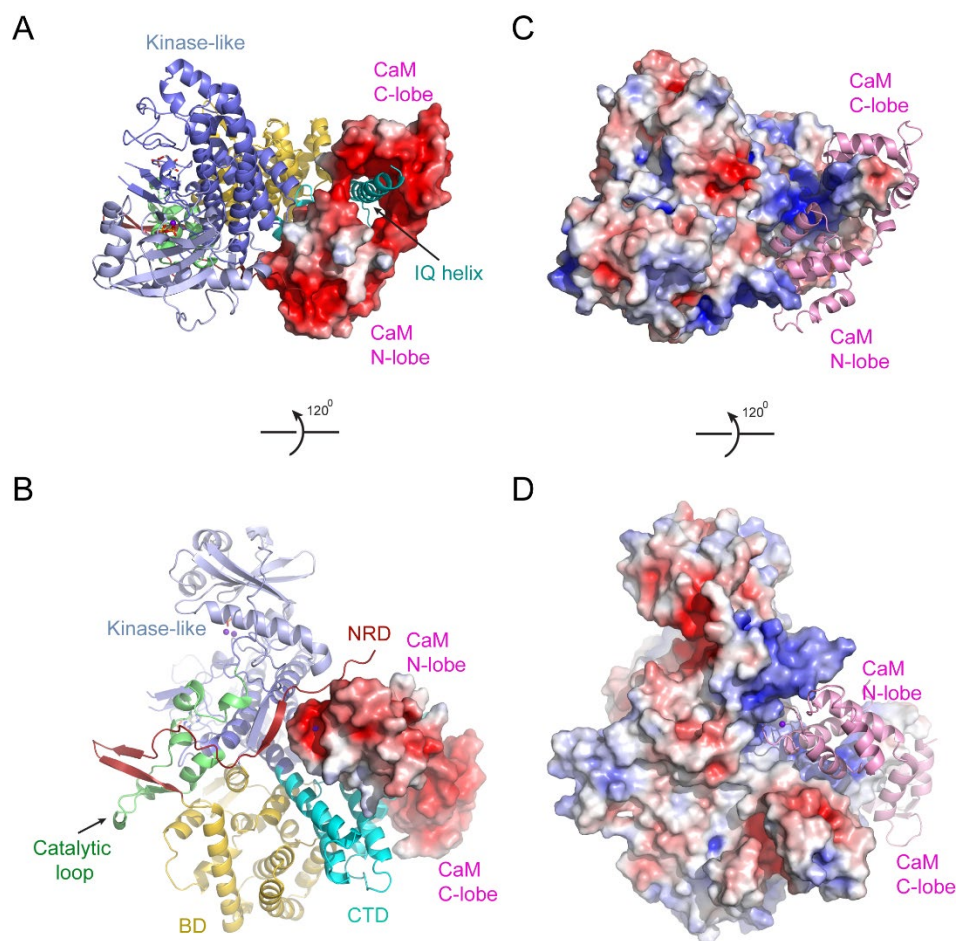

938

939 **Figure 7—figure supplement 1. Electrostatic surface potential analysis of the interaction**

940 **between SidJ and CaM.** (A) The SidJ-CaM complex with SidJ depicted in ribbon and CaM

941 shown with a surface representation colored by electrostatic surface potential with red being

942 negatively charged with -5 eV and charged blue being positively charged with +5 eV. (B) A 120°

943 rotated view of structure in (A). CaM is highly negatively charged as shown from both views. (C)

944 The SidJ-CaM complex with SidJ presented in surface, which is colored according to its

945 electrostatic surface potential (red: -5 eV; blue: +5 eV) and CaM in ribbon. (D) A 120° rotated

946 view of structure in (C). The regions of SidJ interfaced with CaM are significant positively charged

947 as shown from both views.

948

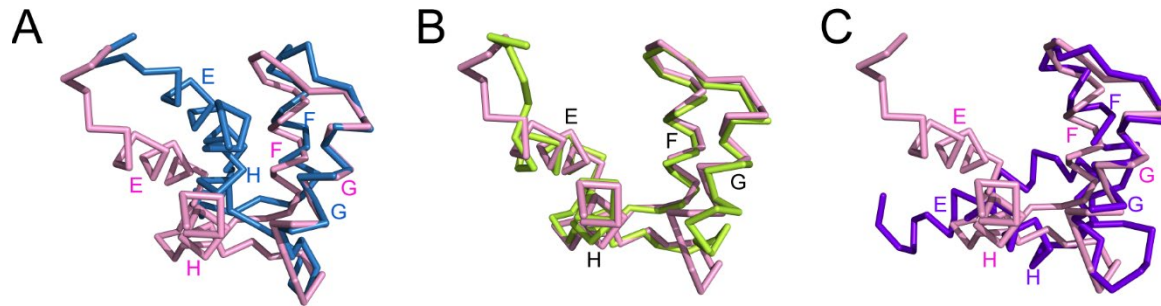

949

950

951 **Figure 7—figure supplement 2. The C-lobe of CaM in the SidJ-CaM complex adopts a**

952 **semi-open conformation.** (A) A structural comparison of the CaM C-lobe in SidJ-CaM complex

953 (pink) with that in apo-CaM (blue) (PDB ID: 1CFC). (B) Structural overlay of the CaM C-lobe

954 in SidJ-CaM complex (pink) with CaM C-lobe (green) bound to the first IQ-motif in myosin V-

955 CaM complex (PDB ID: 2IX7). (C) A structural comparison of the CaM C-lobe in SidJ-CaM

956 complex (pink) with that (purple) in Ca<sup>2+</sup> fully chelated CaM (PDB ID: 1CDL). The structures

957 are overlaid in reference to helices F and G.

958

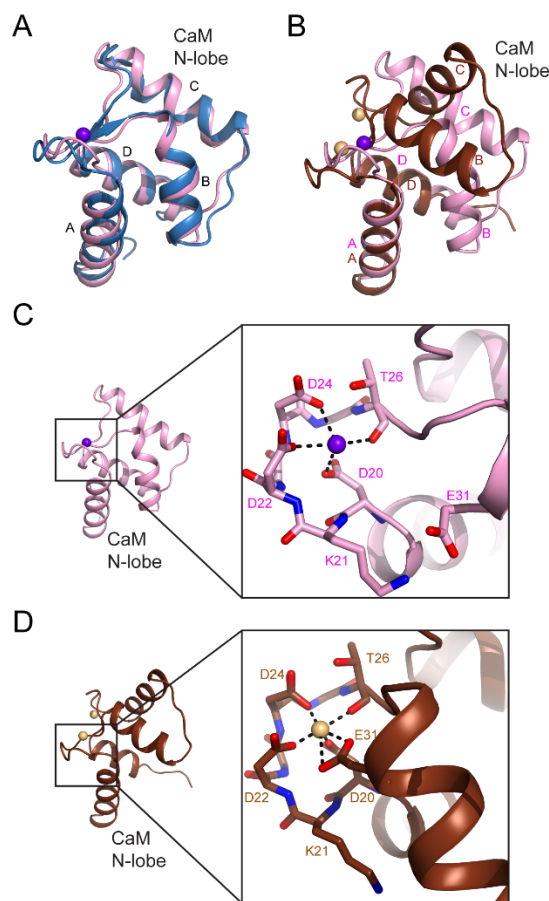

959

960 **Figure 7—figure supplement 3. The N-lobe of the CaM in the SidJ-CaM complex adopts a**  
961 **closed conformation.** (A) A structural comparison of the CaM N-lobe in the SidJ-CaM complex  
962 (pink) with that in apo-CaM (blue) (PDB ID: 1CFC). (B) A structural comparison of the CaM N-  
963 lobe in the SidJ-CaM complex (pink) with that in Ca<sup>2+</sup> chelated CaM (brown) (PDB ID: 1CDL).  
964 (C) The CaM N-lobe in the SidJ-CaM complex is weakly bound by a Ca<sup>2+</sup> ion as it is missing the  
965 –Z coordination due to the position of E31 away from the ion binding site. Thus, the N-lobe  
966 maintains a closed conformation. (D) Ca<sup>2+</sup> chelating at the same binding site in (C) for Ca<sup>2+</sup>  
967 saturated CaM (PDB ID: 1CDL). E31 is fully engaged in coordination with the bound Ca<sup>2+</sup> ion  
968 and is responsible for the open conformation of the N-lobe.

969

970

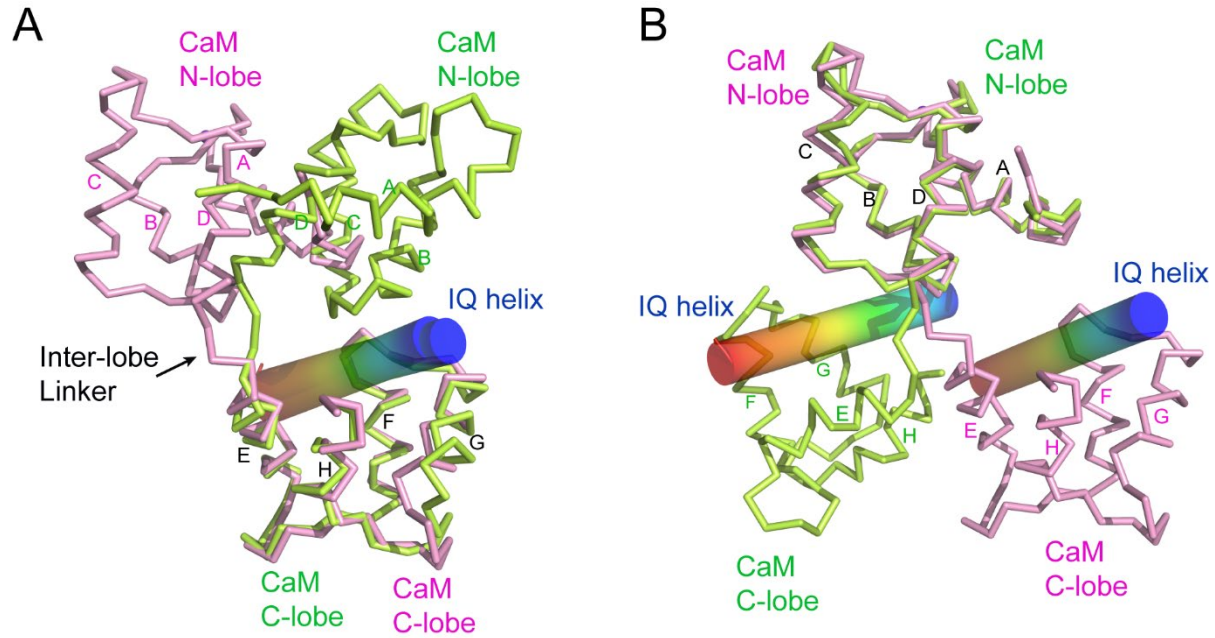

971

972

973 **Figure 7—figure supplement 4. CaM adopts a unique conformation in the SidJ-CaM**

974 **complex.** (A) Structural comparison of CaM (pink) bound to SidJ IQ helix with that (green) bound

975 to myosin V IQ1 (PDB ID: 2IX7). IQ helices displayed as cylinders colored by spectrum from

976 blue to red from the N-terminal to C-terminal ends, respectively. CaM structures are aligned

977 relative to their C-lobes. (B) Structural overlay of same two structures shown in (A) with CaM

978 structure aligned in reference to their N-lobes.

979

980



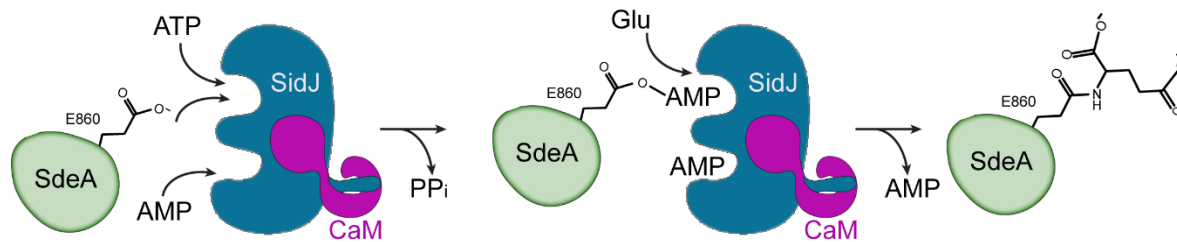

981

982 **Figure 8. Hypothetic reaction model for SidJ-mediated polyglutamylation of SdeA.** SidJ has

983 a kinase-like catalytic cleft, a regulatory nucleotide-binding pocket and C-terminal CaM-binding

984 IQ helix. Binding of a nucleotide to the allosteric regulatory site and CaM with the IQ motif

985 activates SidJ. SidJ mediated SdeA polyglutamylation involves two steps. In the first step, SidJ

986 AMPylates SdeA by transferring the AMP moiety from ATP to the  $\gamma$ -carbonyl group of SdeA

987 E860 and releasing a pyrophosphate molecule. In the second step, a glutamate molecule is

988 activated at the kinase active site and its amino group serves as a nucleophile to attack the

989 AMPylated E860. As a result, this glutamate is conjugated to E860 through an isopeptide bond

990 and an AMP molecule is released.

991

992 **Table 1 | Data Collection, Phasing, and Structural Refinement Statistics.**

993

|                                                           | SeMet SidJ-CaM         | Native SidJ-CaM<br>(PDB ID: 6PLM) |
|-----------------------------------------------------------|------------------------|-----------------------------------|
| Synchrotron beam lines                                    | NLSL II 17-ID-1 (AMX)  | NLSL II 17-ID-1 (AMX)             |
| Wavelength (Å)                                            | 0.97949                | 0.97949                           |
| Space group                                               | P2 <sub>1</sub>        | P2 <sub>1</sub>                   |
| Cell dimensions                                           |                        |                                   |
| <i>a</i> , <i>b</i> , <i>c</i> (Å)                        | 105.08, 104.08, 109.65 | 105.35, 103.79, 110.19            |
| <i>α</i> , <i>β</i> , <i>γ</i> (°)                        | 90, 104.49, 90         | 90, 104.69, 90                    |
| Maximum resolution (Å)                                    | 2.85                   | 2.59                              |
| Observed reflections                                      | 371,678                | 482,266                           |
| Unique reflections                                        | 69,809                 | 69,809                            |
| Completeness (%) <sup>a</sup>                             | 99.5                   | 97.7                              |
| $\langle I \rangle / \langle \sigma \rangle$ <sup>a</sup> | 43.20 (15.30)          | 38.20 (13.20)                     |
| R <sub>sym</sub> <sup>a,b</sup> (%)                       | 0.024 (0.068)          | 0.043(0.091)                      |
| Phasing methods                                           | SAD                    | Native                            |
| Heavy atom type                                           | Se                     | -                                 |
| Number of heavy atoms/ASU                                 | 12                     | -                                 |
| Resolution (Å) <sup>a</sup>                               | -                      | 29.32(2.59)                       |
| R <sub>crys</sub> / R <sub>free</sub> (%) <sup>a,c</sup>  | -                      | 17.6/24.1                         |
| Rms bond length (Å)                                       | -                      | 0.0142                            |
| Rms bond angles (°)                                       | -                      | 1.8174                            |
| Most favored/allowed (%)                                  | -                      | 96.65/3.35                        |
| Generous/Disallowed (%)                                   | -                      | 0                                 |

994 <sup>a</sup> Values in parentheses are for highest-resolution shell.

995 <sup>b</sup>R<sub>sym</sub> =  $\sum_h \sum_i |I_i(h) - \langle I(h) \rangle| / \sum_h \sum_i I_i(h)$ .

996 <sup>c</sup>R<sub>crys</sub> =  $\Sigma(|F_{obs}| - k|F_{cal}|) / \Sigma|F_{obs}|$ . R<sub>free</sub> was calculated for 5% of reflections randomly excluded from the refinement.

997

998
